# 1 **Quantifying biosynthetic network robustness across the human oral microbiome**

2 David B. Bernstein<sup>1,2</sup>, Floyd E. Dewhirst<sup>3,4</sup>, Daniel Segrè<sup>1,2,5,\*</sup>

3

4 <sup>1</sup>Department of Biomedical Engineering, Boston University, Boston, MA 02215, USA

5 <sup>2</sup>Biological Design Center, Boston University, Boston, MA 02215, USA

6 <sup>3</sup>The Forsyth Institute, Cambridge, MA 02142, USA

7 <sup>4</sup>Harvard School of Dental Medicine, Boston, MA 02115, USA

8 <sup>5</sup>Bioinformatics Program, Department of Biology, and Department of Physics, Boston University,  
9 Boston, MA 02215, USA

10 \*Correspondence should be addressed to: Daniel Segrè, [dsegre@bu.edu](mailto:dsegre@bu.edu)

11

## 12 **Abstract**

13 Metabolic interactions, such as cross-feeding, play a prominent role in microbial community  
14 structure. For example, they may underlie the ubiquity of uncultivated microorganisms. We  
15 investigated this phenomenon in the human oral microbiome, by analyzing microbial metabolic  
16 networks derived from sequenced genomes. Specifically, we devised a probabilistic biosynthetic  
17 network robustness metric that describes the chance that an organism could produce a given  
18 metabolite, and used it to assemble a comprehensive atlas of biosynthetic capabilities for 88  
19 metabolites across 456 human oral microbiome strains. A cluster of organisms characterized by  
20 reduced biosynthetic capabilities stood out within this atlas. This cluster included several  
21 uncultivated taxa and three recently co-cultured *Saccharibacteria* (TM7) phylum species.  
22 Comparison across strains also allowed us to systematically identify specific putative metabolic  
23 interdependences between organisms. Our method, which provides a new way of converting  
24 annotated genomes into metabolic predictions, is easily extendible to other microbial  
25 communities and metabolic products.

## 26 Introduction

27 Metabolism, in addition to enabling growth and homeostasis for individual microbes, is a  
28 powerful “currency”, that contributes to the organization of microbes into complex, dynamic  
29 societies. Metabolic interactions are believed to influence microbial community structure and  
30 dynamics at multiple spatial and temporal scales<sup>1-5</sup>. For example, through cross-feeding, a  
31 compound produced by one species might benefit another, leading to a network of metabolic  
32 interdependences<sup>5-10</sup>. An extreme case of interdependence between microbes is believed to  
33 underlie what is usually known as “microbial uncultivability”<sup>11</sup>, i.e. the fact that many microbes  
34 isolated from a given environment do not grow in pure culture on standard laboratory conditions.  
35 This observation, originally proposed as “the great plate count anomaly”<sup>12</sup>, has motivated interest  
36 in understanding the possible mechanisms underlying uncultivability<sup>11,13,14</sup>. One class of  
37 mechanisms is based on the concept that the growth of uncultivable microbes depends on their  
38 community context via diffusible metabolites produced by their neighbors<sup>14</sup>. These dependent  
39 microbes are often referred to as fastidious, due to their limited biosynthetic capabilities and  
40 reliance on externally supplied metabolites for growth. The prominence of fastidious microbial  
41 organisms across the tree of life and their potential importance in microbial community structure  
42 is highlighted by the recent identification of the candidate phyla radiation – a large branch of the  
43 tree of life consisting mainly of uncultivated organisms with small genomes and unique  
44 metabolic properties<sup>15-17</sup>.

45 Some of the most promising strides in understanding metabolic interdependences between  
46 microbes have been taken in the study of the human oral microbiome. The human oral  
47 microbiome serves as an excellent model system for microbial communities research, due to its  
48 importance for human health and ease of access for researchers<sup>18,19</sup>. For example, the order of  
49 colonization of species and the spatial arrangement of microbes in dental plaque have been  
50 thoroughly characterized<sup>20,21</sup>. The human oral microbiome consists of roughly 700 different  
51 cataloged microbial species, identified by 16S rRNA microbiome sequencing<sup>18,22</sup>. Importantly,  
52 63% of species in the human oral microbiome have been sequenced, including several  
53 uncultivated and recently-cultivated strains that have implications in oral health and disease<sup>23,24</sup>.  
54 Exciting recent work has led to successful laboratory co-culture growth of three previously  
55 uncultivated organisms, the *Saccharibacteria* (TM7) phylum taxa: *Saccharibacteria* bacterium

56 HMT-952 strain TM7x<sup>25,26</sup>, *Saccharibacteria* bacterium HMT-488 strain AC001 (not yet  
57 published), and *Saccharibacteria* bacterium HMT-955 strain PM004 (not yet published).  
58 *Saccharibacteria* are prominent in the oral cavity and relevant for periodontal disease<sup>27,28</sup>. Due to  
59 their importance, they were among the first uncultivated organisms from the oral microbiome to  
60 be fully sequenced via single-cell sequencing methods<sup>29</sup>, and represent the first cultivated  
61 members of the candidate phyla radiation<sup>25</sup>. Thus, their metabolic and phenotypic properties are  
62 of great interest for oral health and microbiology in general.

63 In parallel to achieving laboratory growth of uncultivated bacteria, a major unresolved challenge  
64 is understanding the detailed metabolic mechanisms that underlie their dependencies. Ideally,  
65 one would want to computationally predict, directly from the genome of an organism, its  
66 biosynthetic capabilities and deficiencies, so as to translate sequence information into  
67 phenotypes, mechanisms, and community-level predictions<sup>30</sup>. A number of approaches, based on  
68 computational analyses of metabolic networks, have contributed significant progress towards this  
69 goal<sup>31–33</sup>, including in the context of microbial communities<sup>4,5,33–42</sup>. At the heart of these methods  
70 are metabolic network reconstructions, formal encodings of the stoichiometry of all metabolic  
71 reactions in an organism, that are readily amenable to multiple types of *in silico* analyses and  
72 simulations<sup>44</sup>. Recent exciting progress has led to the automated generation of “draft” metabolic  
73 network reconstructions for any organism with a sequenced genome<sup>45</sup>, opening the door for the  
74 quantitative study of large and diverse microbial communities. Despite this promise, the most  
75 commonly used metabolic network analysis methods, such as flux balance analysis (FBA)<sup>46</sup> or  
76 its dynamic version (dFBA)<sup>47</sup>, are not applicable to these draft metabolic networks due to gaps  
77 (missing or incorrect reactions) in the metabolic network. Methods for “gap-filling” draft  
78 reconstructions can alleviate this problem at the expense of an increased risk for false positive  
79 predictions. Additionally, gap-filling requires specific assumptions on the growth media  
80 composition – which is often difficult to obtain for diverse environmental isolates and by  
81 definition unknown for uncultivated organisms. Thus, the capacity to provide predictions based  
82 on unelaborated genome annotation, and on limited knowledge about an organism’s growth  
83 environment remains an important open challenge. Metabolic network analysis methods that are  
84 less dependent on gap-filling have been applied to the analysis of draft metabolic  
85 reconstructions, generally with a focus on metabolic network topology<sup>48–50</sup>. Some of these  
86 methods have provided valuable insight into the biosynthetic potentials of organisms and

87 metabolites<sup>51,52</sup>, the chance of cooperation or competition between species<sup>53-56</sup>, and the  
88 relationship between organisms and environment<sup>48,57,58</sup> including in the human gut  
89 microbiome<sup>59</sup>. However, these methods often depend on specific assumption on environmental  
90 conditions<sup>49,50</sup>, or cannot be easily reconciled with stoichiometry-based constraints<sup>48</sup>.

91 Here we introduce a new method, which alleviates the above limitations, and provides a novel  
92 metabolic prediction – an estimate of biosynthetic network robustness. Our method applies a  
93 probabilistic approach to define and compute a metric that provides an estimate of which  
94 metabolites, such as biomass components, are robustly synthesized by a given metabolic network  
95 and which would likely need to be supplied from the environment/community. Discrepancies in  
96 these calculated estimates between organisms can be used to generate hypotheses regarding  
97 microbial auxotrophy and metabolic exchange in microbial communities. Importantly, our metric  
98 can provide an environment-independent characterization by randomly sampling many different  
99 possible nutrient combinations, and is not dependent on *a priori* biosynthetic pathway definitions  
100 as it depends only on the stoichiometric constraints of the metabolic network. We applied this  
101 method to a large number of organisms from the human oral microbiome, and identified broad  
102 trends in biosynthetic capabilities. We focused in particular on uncultivated microorganisms,  
103 including three recently co-cultured *Saccharibacteria* (TM7) strains. In addition to highlighting  
104 their biosynthetic deficiencies, we developed specific hypotheses for their metabolic exchange  
105 with growth-supporting co-culture partners.

## 106 **Analysis Method**

107 Our newly developed method quantifies a concept we call biosynthetic network robustness.

108 Robustness, in this sense, refers to the ability of the network to produce a specified target  
109 metabolite, from variable metabolic precursors. In essence, our metric for biosynthetic network  
110 robustness provides a measure of how well a particular metabolic network can produce a  
111 particular target across a uniformly sampled set of possible environments.

112 The inspiration for this method comes from the statistical physics concept of percolation.  
113 Percolation theory has been applied broadly with applications ranging from materials science to  
114 epidemiology, as well as to the study of cascading metabolic failure upon gene deletions in  
115 metabolism<sup>60</sup>. In percolation theory the robustness of a network can be characterized by  
116 randomly adding or removing components (nodes or edges) of a network and assessing network  
117 connectivity<sup>61</sup>. We utilized this concept to characterize the network robustness of a particular  
118 metabolic network towards a specified target metabolite by randomly adding input metabolites to  
119 the network and assessing the network's ability to produce the specified target metabolite.

120 To implement our method, we first introduced a probabilistic framework for analyzing metabolic  
121 networks (Figure 1 A). In this framework, every metabolite can be considered to be drawn from  
122 a Bernoulli distribution, *i.e.* present in the network with a given input probability ( $P_{in}$ ). These  
123 probabilities could represent beliefs about the environment, chances of metabolites being  
124 available from a host organism, or any arbitrary prior on metabolite inputs. Throughout the  
125 implementation of our method, we have assigned  $P_{in}$  to be an identical value for all input  
126 metabolites. However, future implementations of this probabilistic framework could easily  
127 utilize  $P_{in}$  values that vary across metabolites, e.g. matching experimentally measured  
128 abundances. Following the assignment of  $P_{in}$ , the network structure can be used to calculate the  
129 output probability ( $P_{out}$ ) of some specified target metabolite. In practice, random sampling of  
130 probabilistically drawn input metabolite sets is used to calculate the probability of producing the  
131 target metabolite. For each random sample, flux balance analysis<sup>46</sup> with inequality mass balance  
132 constraints is used to assess the networks ability to produce the target metabolite (for a complete  
133 explanation of how flux balance analysis is implemented in this context, see methods section:  
134 Algorithm functions, *feas*).

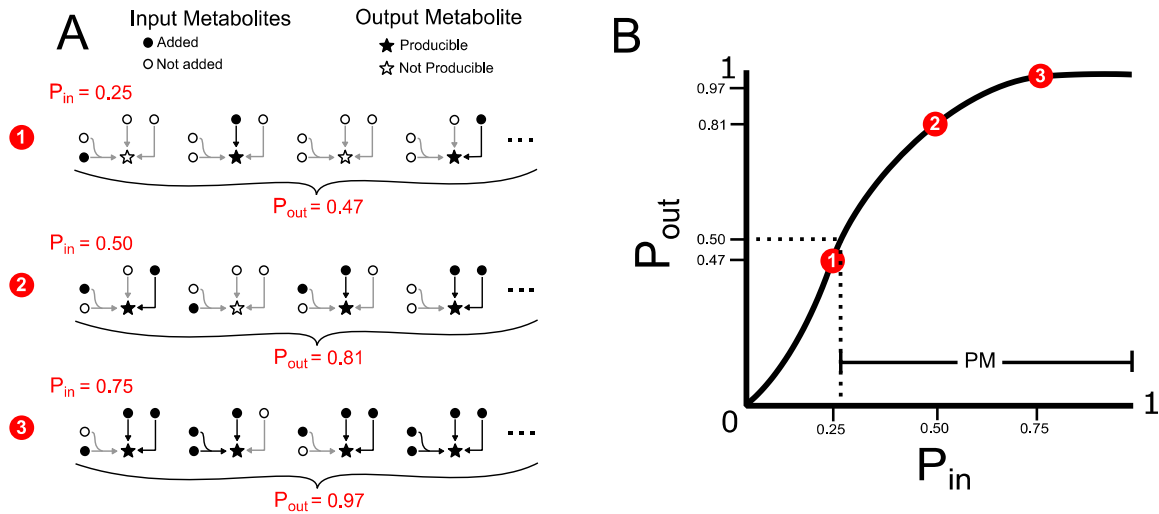

135

### 136 **Figure 1: Biosynthetic network robustness analysis framework**

137 A probabilistic framework was developed to calculate the biosynthetic network robustness of a given metabolic  
 138 network and target metabolite.

139 (A) Input probabilities ( $P_{in}$ ) are assigned to each input metabolite to designate the probability of adding that  
 140 metabolite to the network. For our implementation, each input metabolite is assigned an identical  $P_{in}$  value. Random  
 141 sets of input metabolites are sampled, based on  $P_{in}$ , and a modified version of flux balance analysis is used to  
 142 determine if the network can produce a specified target output metabolite for each random sample. Many random  
 143 samples are taken to estimate the output probability ( $P_{out}$ ) of the target output metabolite. Three examples of  $P_{in}$   
 144 values and the corresponding  $P_{out}$  values are shown for a very simple network and target output metabolite. The  
 145 output probabilities here were calculated using the probabilistic equation  $P_{out} = 1 - [(1 - P_{in})^2 * (1 - P_{in}^2)] =$   
 146  $2P_{in} - 2P_{in}^3 + P_{in}^4$ . For more information on this equation please refer to Supplementary Figure 1.

147 (B) A producibility curve can be calculated which represents  $P_{out}$  as a function of  $P_{in}$ . Points along this curve can be  
 148 sampled by assigning the  $P_{in}$  value and estimating  $P_{out}$ . The three examples from A are shown in red on the curve in  
 149 B. The producibility metric (PM) is used to summarize the producibility curve, and quantifies biosynthetic network  
 150 robustness. It is defined by the value of  $P_{in}$  at which  $P_{out}$  equals 0.5, analogous to the  $K_m$  value of the Michaelis-  
 151 Menten curve. PM is equal to 1 minus this value, such that increasing PM correspond to increasing biosynthetic  
 152 network robustness.

153 The probabilistic method that we introduced allows the definition of two novel concepts, the  
154 “producibility curve” and “producibility metric” (PM) (Figure 1 B). The producibility curve is a  
155 plot of  $P_{out}$  as a function of  $P_{in}$ . For a given metabolic network and metabolite target, this curve  
156 can be estimated by sampling input metabolites for different values of  $P_{in}$  (between 0 and 1), and  
157 calculating  $P_{out}$  (Figure 1 B red points). The PM is a single metric which encapsulates  
158 biosynthetic network robustness by summarizing the producibility curve. The PM is defined by  
159 the  $P_{in}$  value along the producibility curve at which  $P_{out}$  is equal to 0.5. The PM value is equal to  
160 1 minus this  $P_{in}$  value, by convention, such that larger PM values correspond to increased  
161 robustness. An analogy can be drawn between the mathematical representation of PM and the  
162 half maximal concentration constant  $K_m$  in the Michaelis-Menten sigmoidal curve. Our method  
163 calculates PM efficiently by random sampling and a nonlinear fitting algorithm (for details, see  
164 methods section: Algorithm functions *calc\_PM\_fit\_nonlin*). In addition to being quantified  
165 computationally for arbitrary metabolic networks and metabolites, the PM can also be obtained  
166 analytically by using combinatorial considerations (see Supplementary Figure 1). This analytical  
167 result clarifies the connection between our metric and the concept of minimal precursor sets<sup>62</sup>,  
168 and could serve as the basis for further theoretical work on the fundamental properties of  
169 metabolic networks.

170 The algorithms used to implement our method are written in MATLAB and designed as a set of  
171 modular functions that interface with the COBRA toolbox – a popular metabolic modeling  
172 software compendium<sup>63,64</sup>. The methodology behind each function is further explained in the  
173 methods section. The code is freely available online at  
174 [https://github.com/segrelab/biosynthetic\\_network\\_robustness](https://github.com/segrelab/biosynthetic_network_robustness).

## 175 **Results**

### 176 *Analysis of the E. coli core metabolic network*

177 Before applying our approach to the systematic study of genome-scale metabolic networks from  
178 the human oral microbiome, we used a simpler, well characterized metabolic network model to  
179 illustrate its performance and interpretation. We applied our method to the *E. coli* core metabolic  
180 network, a simplified representation of *E. coli* metabolism consisting of central carbon  
181 metabolism and lacking peripheral metabolic pathways, such as amino acid or cofactor  
182 biosynthesis<sup>65</sup>. We analyzed the biosynthetic network robustness of the *E. coli* core metabolic  
183 network by calculating the PM value for all intracellular metabolites in this network. The results  
184 are shown in Figure 2 A, overlaid on the metabolic network, with each node's color indicating its  
185 PM value and node size indicating its degree. The *E. coli* core metabolic network is highly  
186 connected and this leads to most metabolites having high PM values (PM > 0.950), matching  
187 expectations. For example, the metabolites H<sup>+</sup> and pyruvate are both highly connected in the  
188 metabolic network and have high biosynthetic network robustness (PM = 0.968 and 0.952  
189 respectively). However, the network also contains several metabolites that are well connected,  
190 but have low PM values. These include, for example, the cofactors AMP/ADP/ATP and  
191 NAD<sup>+</sup>/NADH, which have PM values of ~0.7 and ~0.5 respectively, because they can be  
192 recycled from each other, but not biosynthesized in this network. The network also includes  
193 several examples of the opposite situation, i.e. metabolites that are poorly connected but have  
194 high PM values. One example is D-lactate, which is produced via Lactate Dehydrogenase (LDH)  
195 from the high PM metabolites Pyruvate and H<sup>+</sup> (Figure 2 B). This reaction also consumes NADH  
196 and produces NAD<sup>+</sup>, but because these cofactors can be easily recycled from each other by a  
197 large number of different reactions they have minimal influence on the PM value of D-lactate  
198 (Figure 2 B). This example demonstrates the fact that our metric captures metabolites which are  
199 easily produced because their precursors are easily produced, and that the utilization of recycled  
200 cofactors has minimal influence on the PM. Overall, there is no significant correlation between  
201 the PM values and the node degree of a metabolite in the network (Supplementary Figure 2),  
202 indicating that our metric describes a unique property of a metabolite in a metabolic network that  
203 is not captured simply by node degree.



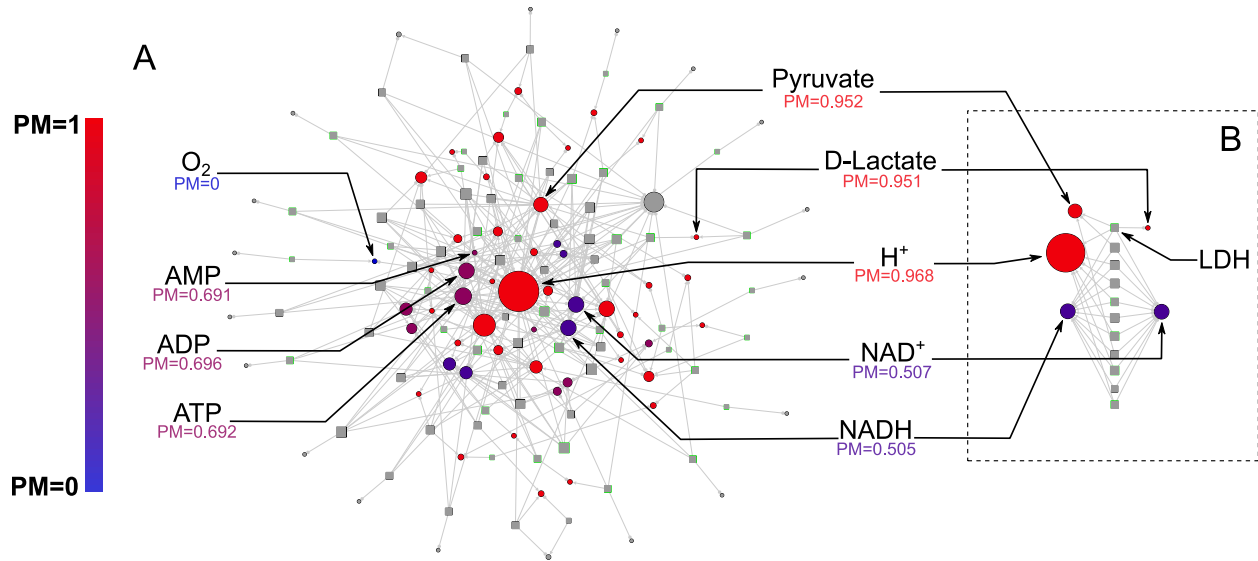

204

## 205 **Figure 2: Biosynthetic network robustness of the *E. coli* core metabolic network**

206 We calculated the producibility metric (PM) for all intracellular metabolites in the *E. coli* core metabolic network to  
207 demonstrate the implementation of our method on a simple network.

208 (A) The network is represented as a bipartite graph with metabolites shown as circles and reactions shown as  
209 squares. Reactions shown with a green border are reversible in the model. All intracellular metabolites are colored  
210 based on their PM value (low – blue, high – red). Reactions and metabolite nodes are sized based on their total node  
211 degree. Several key metabolites of interest are highlighted with their corresponding PM values shown. Central  
212 metabolites such as H<sup>+</sup> and Pyruvate have high degree and high PM. Cofactors such as AMP/ADP/ATP and  
213 NAD<sup>+</sup>/NADH have high degree but low PM, as they cannot be biosynthesized in this network. Oxygen is an  
214 example of a PM 0 metabolite that cannot be produced from any other metabolites in this network. D-lactate is an  
215 example of a metabolite with low degree and high PM i.e. it is easily produced but not well-connected.

216 (B) Reactions related to the cofactors NAD<sup>+</sup> and NADH are shown in a separate panel. The top reaction, Lactate  
217 Dehydrogenase (LDH), is shown with all substrates while all other reactions are shown without additional  
218 substrates. The metabolite D-lactate has high PM despite being poorly connected in the metabolic network because  
219 it can be produced from the high PM metabolites pyruvate and H<sup>+</sup> via LDH. This reaction also consumes NADH and  
220 produces NAD<sup>+</sup>, however these cofactors have minimal impact on the PM because they are easily recycled in the  
221 network by a large number of different reactions.

## 222 ***Reconstruction of human oral microbiome metabolic networks***

223 We next applied our method to the human oral microbiome, aiming at a mechanistic  
224 characterization of the biochemical capabilities of different microbes based on metabolic  
225 networks reconstructed directly from their genomes. As a first step, we reconstructed metabolic  
226 networks for 456 different microbial strains representing a diverse set of human oral microbes,  
227 whose annotated genomes were available from the Human Oral Microbiome Database (see  
228 methods section for details). These organisms represent 371 different species, 124 genera, 64  
229 families, 35 orders, 22 classes, and 12 phyla. Metadata related to the selected organisms can be  
230 found in Supplementary Table 1. Notably, the database includes several sequenced yet  
231 uncultivated or recently co-cultured organisms. This fact, together with the unique flexibility of  
232 our analysis, allowed us to obtain insight into these microbes. In particular, the following  
233 sequenced yet uncultivated, or recently co-cultured, strains were included in our analysis:  
234 *Saccharibacteria* (TM7) bacterium HMT-952 strain TM7x<sup>25</sup>, *Saccharibacteria* (TM7) bacterium  
235 HMT-955 strain PM004, *Saccharibacteria* (TM7) bacterium HMT-488 strain AC001,  
236 *Tannerella* HMT-286 strain W11667<sup>66</sup>, *Anaerolineae* (*Chloroflexi* phylum) bacterium HMT-439  
237 strain Chl2<sup>67</sup>, *Absconditabacteria* (SR1) bacterium HMT-874 strain MGEHA<sup>68</sup>, and  
238 *Desulfobulbus* HMT-041 strains Dsb2 and Dsb3<sup>69</sup>. All of the selected genomes were used to  
239 reconstruct sequence-specific draft metabolic networks using the Department of Energy Systems  
240 Biology Knowledgebase (KBase) and the build metabolic model app<sup>45,70,71</sup>. The networks were  
241 reconstructed without any gap-filling to increase the specificity of the resulting predictions. A  
242 KBase narrative containing the genomes and draft metabolic network reconstructions can be  
243 found at: <https://narrative.kbase.us/narrative/ws.27853.obj.935>. The complete collection of all  
244 network models is also available for download in MATLAB (.mat) format at  
245 [https://github.com/segrelab/biosynthetic\\_network\\_robustness](https://github.com/segrelab/biosynthetic_network_robustness).

## 246 ***Large-scale analysis of biosynthetic capabilities across the human oral microbiome***

247 We analyzed the biosynthetic network robustness for 88 different biomass metabolites across the  
248 aforementioned 456 metabolic networks from the human oral microbiome. The 88 biomass  
249 metabolites included all biomass building blocks considered to be essential for either Gram-  
250 negative or Gram-positive biomass, as listed in the KBase build metabolic models app<sup>45,70,71</sup>  
251 (listed in Supplementary Table 2). Through this analysis we calculated 40,128 PM values which

252 represent an atlas of biosynthetic capabilities across these human oral microbiome organisms.  
253 The ensuing atlas is represented as hierarchically bi-clustered PM values for all 456 organisms  
254 and 88 metabolites in Figure 3. The same data is available in Supplementary Figure 3 (clustered  
255 by taxonomy), and in Supplementary Table 3.

256 The hierarchically clustered heat map (Figure 3) shows extensive variability in the PM values of  
257 different organisms and metabolites across the oral microbiome. There are three main large  
258 clusters of metabolites: one cluster with consistently high PM (top), one cluster with low PM  
259 values (middle), and one cluster with variable PM (bottom). Different classes of metabolites  
260 cluster quite differently across this landscape. In addition to simple ubiquitous metabolites, such  
261 as H<sub>2</sub>O or glycine (Figure 3 I), all nucleotides have high PM across the oral microbiome  
262 organisms. Amino acids generally have high PM as well, with the notable exception of L-  
263 tryptophan (Figure 3 II). Interestingly, L-tryptophan is known to be a particularly difficult amino  
264 acid to synthesize<sup>72</sup>. Metal ions generally had PM value of 0 across all organisms, serving as an  
265 expected negative control. Some exceptions, such as Mg<sup>2+</sup>, Co<sup>2+</sup>, Cl<sup>-</sup>, Fe<sup>3+</sup>, and Fe<sup>2+</sup>, can be  
266 explained based on their presence in larger compounds, such as porphyrins. For example, Co<sup>2+</sup>  
267 has increased PM values in a pattern that closely follows the PM values of the cobalt containing  
268 vitamin cobamamide (Figure 3 III).

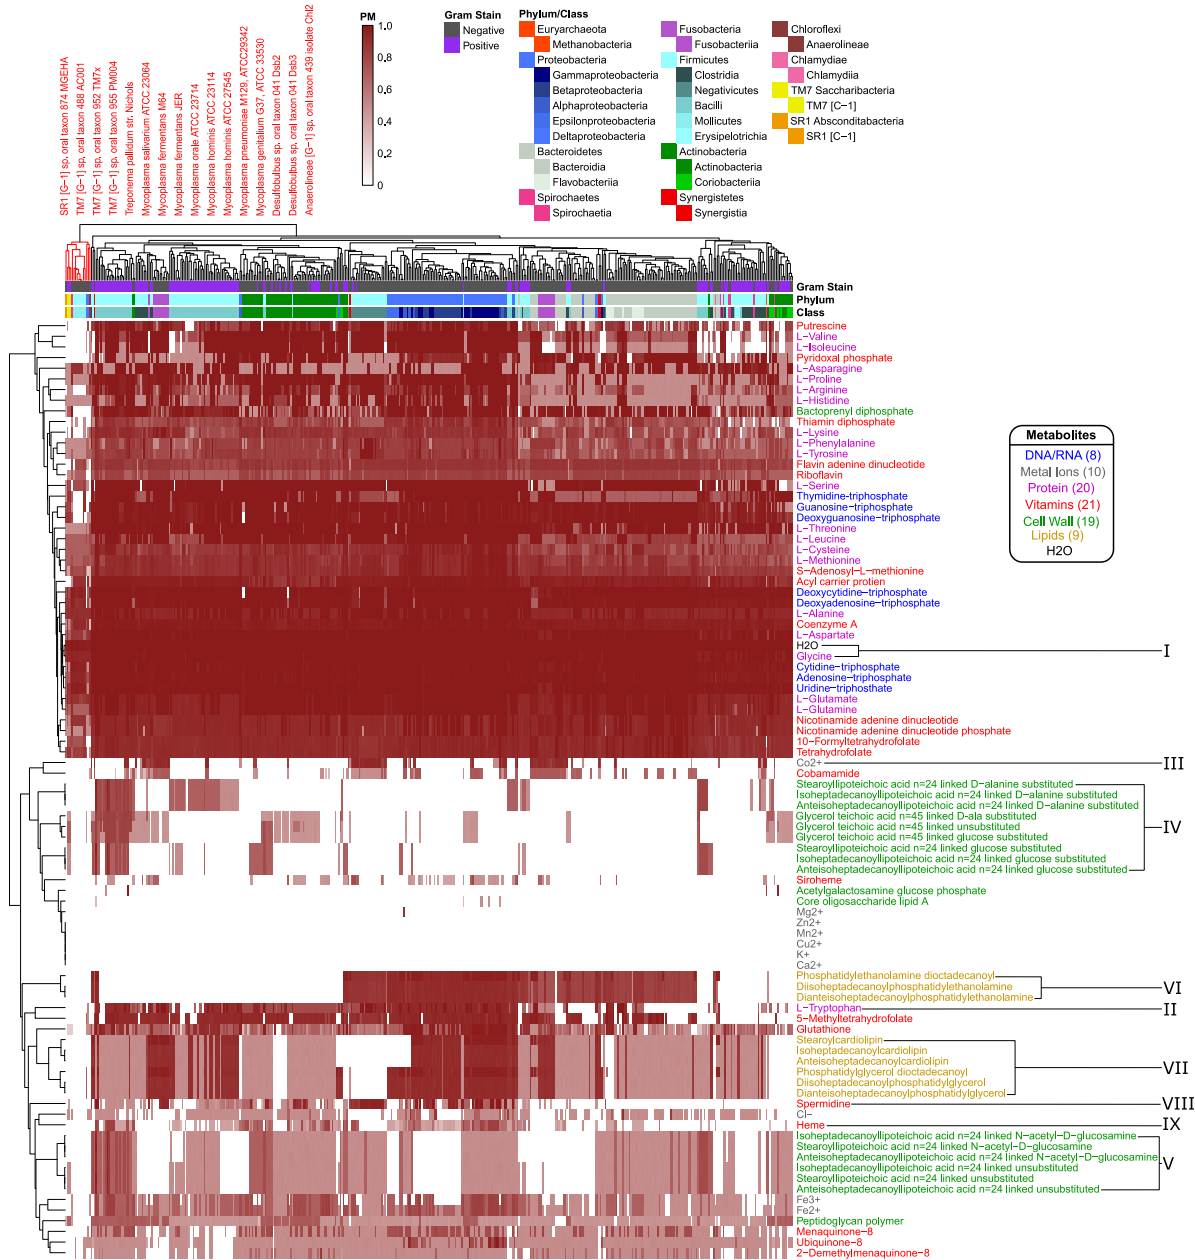

269

270 **Figure 3: Human oral microbiome organisms biosynthetic network robustness matrix**

271 The producibility metric (PM) was calculated for 456 different oral microbiome organisms (columns) and 88  
 272 different essential biomass metabolites (rows). The resulting matrix is hierarchically bi-clustered based on average  
 273 distances between organisms and metabolites PM values. Organism Gram-stain and phylum/class are indicated by  
 274 several annotation columns at the top of the matrix. The biomass metabolites analyzed consisted of several different  
 275 types of metabolites indicated with different colors. Several metabolites that showed interesting patterns across oral  
 276 microbiome organisms are highlighted with roman numerals. The most distinct cluster of organisms is highlighted  
 277 and annotated (top left), which consisted of fastidious reduced-genome organisms (*Mycoplasma*, *Treponema*) and  
 278 uncultivated or recently cultivated organisms (*SR1*, *TM7*, *Desulfobulbus*, *Anaerolineae*).

279 Before analyzing in detail the patterns identifiable in the PM atlas of Figure 3, we showed that  
280 such patterns cannot be trivially attributed to simple broad properties, such as genome size, even  
281 if genome size is known to be an important predictor of the overall biosynthetic capabilities of an  
282 organism<sup>73</sup>. Fastidious or parasitic organisms tend to have reduced genomes and consequently  
283 reduced metabolic capabilities. In our data, the overall average PM value for each organism can  
284 be partially predicted by genome size. A linear regression model and quadratic regression model  
285 which used the log of genome size to predict the average PM value across all metabolites for  
286 each organism had  $R^2$  values of 0.498 and 0.551 respectively (Supplementary Figure 4A).  
287 However, by using Akaike information criterion (AIC) and Bayesian information criterion (BIC)  
288 statistical analyses<sup>74</sup> (Supplementary Figure. 4B, C), we found that adding taxonomic parameters  
289 to these regression models significantly improved model performance. This indicates that our  
290 data contains additional structure beyond simply genome size. In particular, both the AIC and  
291 BIC improve up to at least the order level indicating that there is additional structure up to this  
292 taxonomic level.

293 We further investigated, quantitatively, the associations between different taxonomic groups and  
294 the PM values of various metabolites by calculating the log likelihood ratio between a quadratic  
295 regression model predicting the PM values for a particular metabolite based solely on genome  
296 size against one that incorporates a specific taxonomic parameter of interest (Supplementary  
297 Figure 5, methods). This allowed us to highlight metabolites with highly significant increased or  
298 decreased PM values in certain taxonomic groups, and to confirm patterns that we observed by  
299 eye in Figure 3 and Supplementary Figure 3. These patterns and observations are elaborated in  
300 the following section.

### 301 *Capturing specific biosynthetic patterns across human oral microbiome organisms*

302 Numerous patterns and details of the atlas of biosynthetic capabilities captured by the PM values  
303 (Figure 3) could be relevant for addressing specific biological questions or model refinement  
304 challenges. Here we focus in detail on two specific classes of compounds: (i) cell-wall and  
305 membrane components, which tend to vary broadly across organisms, and are important for  
306 antimicrobial susceptibility and immune system recognition; and (ii) amino acids and essential  
307 factors (e.g. vitamins), which could be relevant for understanding metabolic exchange among  
308 bacteria and with the host.

309 A first striking pattern in the atlas of biosynthetic capabilities captured by the PM values (Figure  
310 3) is the complexity of cell-wall and membrane components of different taxa. Some aspects of  
311 this pattern are consistent with standard attribution of metabolites associated with the Gram  
312 staining categories (estimated using the KBase build metabolic model app<sup>45,70,71</sup>). However, we  
313 also observed interesting deviations, which could be partially attributed to known finer resolution  
314 in the specific membrane components across taxa. Compared to other metabolites, cell-wall  
315 components generally tend to have variable or low PM values across the oral microbiome  
316 organisms. We analyzed in detail fifteen different teichoic acids, a class of metabolites expected  
317 to be found in the cell wall of Gram-positive organisms that play an important role in microbial  
318 physiology and interactions with the host<sup>75</sup>. Of these, nine were found to have higher PM values  
319 in Gram-positive organisms, as expected (Figure 3 IV). In particular, the D-alanine substituted  
320 lipoteichoic acids had high PM values in the phylum *Firmicutes* and specifically the class  
321 *Bacilli*. However, there was another set of 6 teichoic acids that had intermediate PM values  
322 across a large number of organisms and didn't follow Gram-staining trends (Figure 3 V). These  
323 consisted of three N-acetyl-D-glucosamine linked and three unsubstituted teichoic acids. As  
324 detailed in Supplementary Text 1, the increased PM for this teichoic acid in many Gram-negative  
325 species can be attributed to the presence of a specific gene<sup>76-78</sup> that may merit closer inspection  
326 in the network reconstruction process.

327 We further observed clear trends associated with several lipids which are expected to be found in  
328 the cell membrane of both Gram-positive and Gram-negative organisms. In particular, we found  
329 a strong increase in the PM value for three phosphatidylethanolamine lipids in Gram-negative  
330 organisms (Figure 3 VI). Interestingly, these lipids have been previously observed to be more  
331 commonly produced in Gram-negative organisms, and have implications for antimicrobial  
332 susceptibility<sup>79,80</sup>. We also identified trends associated with three cardiolipin and three  
333 phosphatidylglycerol lipids that display generally similar PM patterns across different species  
334 (Figure 3 VII). One class of organisms that stands out with respect to lipid biosynthesis are the  
335 *Negativicutes*. These organisms have relatively high PM values for phosphatidylethanolamine  
336 but PM values of 0 for cardiolipin and phosphatidylglycerol lipids. Consistent with this result, it  
337 has been previously observed that the *Negativicutes* organism *Selenomonas ruminantium* lacks  
338 cardiolipin and phosphatidylglycerol lipids in its inner and outer cell membranes, but does have  
339 phosphatidylethanolamine<sup>81</sup>. It has been hypothesized that the membrane stabilizing role of these

340 two missing lipids could be partially fulfilled by peptidoglycan bound polyamines, including  
341 spermidine, in *Selenomonadales* organisms<sup>81,82</sup>. Concordantly, we see an increased PM value for  
342 the polyamine spermidine across *Negativicutes* in our data (Figure 3 VIII).

343 Aside from lipids and cell-wall components, there are a number of interesting trends related to  
344 several amino acids and other essential factors in our data. A number of metabolites had notably  
345 increased PM in the phylum *Proteobacteria* and decreased PM values in the phylum  
346 *Bacteroidetes*. A notable example is heme, which can be seen to follow this trend (Figure 3 IX).  
347 Heme plays an important role in microbe host interactions, as bacterial pathogens often acquire it  
348 from their human host<sup>83</sup>. In the context of the human oral microbiome, the oral pathogen  
349 *Porphyromonas gingivalis* (belonging to the class *Bacteroidetes*) is known to scavenge heme<sup>84</sup>,  
350 compatible with the above pattern. Other metabolites that displayed the same trend include: L-  
351 arginine, L-cysteine, L-methionine, L-tryptophan, and glutathione. L-arginine can be catabolized  
352 via the arginine deiminase pathway to regenerate ATP and is thus an interesting exchange  
353 metabolite beyond its use as a protein building block<sup>85,86</sup>. L-tryptophan is one of the highest cost  
354 amino acids to biosynthesize<sup>72</sup>, and thus is an intriguing exchange candidate. L-methionine and  
355 L-cysteine are the only two sulfur containing standard amino acids, and glutathione is  
356 synthesized from L-cysteine. It's possible that the discrepancies between PM values observed  
357 here are indicative of broad amino acid and vitamin exchange between the classes  
358 *Proteobacteria* and *Bacteroidetes* in the human oral microbiome.

### 359 ***Uncovering biosynthetic deficiencies in fastidious human oral microbiome organisms***

360 In addition to dissecting the patterns associated with specific metabolites, one can analyze the  
361 PM landscape of Figure 3 from the perspective of the organisms and their agglomeration into  
362 clusters. Given their importance in disease and the unresolved challenges related to their reduced  
363 metabolic capabilities, we focused specifically on fastidious human oral microbiome organisms.  
364 Strikingly, in our large clustered PM matrix, the most distinct hierarchical cluster of organisms  
365 consisted of a number of fastidious organisms (Figure 3 top left). This cluster included all of the  
366 *Mycoplasma* genomes that we analyzed, and one *Treponema* genome. *Mycoplasma* and  
367 *Treponema* are genera that are known to be parasitic and have evolved to have reduced genomes  
368 and metabolic capabilities<sup>87-91</sup>. The remaining members of this cluster included nearly all of the  
369 sequenced yet uncultivated, or recently co-cultured, organisms in our study. The organisms

370 included were from the phyla: *Absconditabacteria* (SR1), *Saccharibacteria* (TM7),  
371 *Proteobacteria* (genus *Desulfobulbus*), and *Chloroflexi* (class *Anaerolineae*). Only one of the  
372 previously uncultivated organism we analyzed was found outside of this fastidious cluster,  
373 namely *Tannerella* HMT-286. Interestingly, this bacterium is hypothesized to rely on externally  
374 supplied siderophores to support its growth<sup>66</sup>. This type of protein dependency is not captured by  
375 our metabolic analysis and highlights the fact that, while uncultivability can be driven by many  
376 different mechanisms, our method captures the prominent effect of reduced metabolic capacity.  
377 The other uncultivated organisms that we identified in this cluster have been hypothesized to  
378 have reduced genomes and limited metabolic capabilities underlying their fastidious nature,  
379 much like *Mycoplasma*.

380 We sought to gain clearer insight into the metabolic properties of these co-clustered fastidious  
381 organisms by re-clustering their PM submatrix (Figure 4 A). By comparing the PM values in this  
382 fastidious cluster to those in the average oral microbiome organisms, it is clear that the fastidious  
383 organisms had reduced PM values for a large number of metabolites including cell-wall  
384 components, lipids, amino acids, and other essential factors. When ranking metabolites by their  
385 difference in average PM between all oral microbiome organisms and the fastidious cluster a  
386 number of amino acids and vitamins stand out as being the most depleted in the fastidious  
387 cluster. The top metabolites where: pyridoxal phosphate, L-valine, putrescine, L-isoleucine,  
388 bactoprenyl diphosphate, thiamin diphosphate, 5-methyltetrahydrofolate, L-lysine,  
389 deoxyguanosine triphosphate, L-tryptophan, and guanosine-triphosphate. These metabolites may  
390 be particularly relevant with regards to exchange between fastidious organisms and their oral  
391 microbiome community partners. Amino acids, in particular, have been hypothesized to be  
392 involved in metabolic exchange between microbial organisms in communities<sup>1, 7, 37,92</sup>. Notably,  
393 amino acids with reduced PM in the fastidious cluster (i.e. amino acids more readily produced by  
394 other organisms) tend to be among the more costly ones<sup>72</sup>, as indicated by a Spearman  
395 correlation analysis ( $\rho = 0.4595$ , P-value = 0.0415). An exception to this trend, potentially  
396 interesting for follow up studies, is the case of the branched chain amino acids L-valine, and L-  
397 isoleucine, which are the two amino acids with most reduced PM in fastidious organisms, but are  
398 not among the costliest. Notably, branched chain amino acid supplementation has been shown to  
399 alter the metabolic structure of the gut microbiome of mice<sup>93</sup>.





412 To gain more specific insight into a specific class of recently-cultivated fastidious organisms,  
413 *Saccharibacteria* (TM7), we further focused our analysis on identifying discrepancies between  
414 *Mycoplasma* and TM7. Our analysis included eight *Mycoplasma* genomes and three TM7  
415 genomes. *Mycoplasma* are a relatively well characterized genus of intracellular parasites with  
416 reduced metabolic capabilities, and TM7 are a recently co-cultured phylum of the candidate  
417 phyla radiation that display reduced metabolic capabilities and a parasitic lifestyle. Comparing  
418 these two groups of organisms gives deeper insight into the unique metabolic capabilities of  
419 each. There are several cell-wall components for which TM7 has relatively high PM values and  
420 *Mycoplasma* has PM values of zero (Figure 4 I). These include nine different teichoic acids,  
421 bactoprenyl diphosphate, and peptidoglycan. This highlights extensive cell-wall/peptidoglycan  
422 metabolism in TM7 organisms and the known lack of a cell-wall in *Mycoplasma*<sup>91</sup>. Furthermore,  
423 a set of three nucleotides: dGTP, GTP, and TTP, have high PM values for TM7 and PM values  
424 of zero for *Mycoplasma* organisms (Figure 4 II). This pattern of nucleotide biosynthesis  
425 deficiency in *Mycoplasma* is consistent with the observation that some strains have been shown  
426 to be dependent on supplementation of thymidine and guanosine but not adenine or cytosine  
427 nucleobases for growth<sup>94</sup>. Finally, the cofactors acyl carrier protein (ACP) and flavin adenine  
428 dinucleotide (FAD) had high PM values in *Mycoplasma* and PM values of zero in TM7  
429 organisms (Figure 4 III). The lack of these cofactors in TM7 seems surprising, but is indeed  
430 matched by a complete lack of any metabolic reactions annotated to utilize FAD and ACP as  
431 cofactors in the draft reconstruction of the TM7 metabolic networks.

432 In addition to investigating the metabolic deficiencies of fastidious organisms, the PM landscape  
433 gave us the opportunity to compare these gaps with possible complementary capabilities in  
434 organisms known to support their growth. The three TM7 strains that we analyzed were recently  
435 co-cultured with host bacteria from the human oral microbiome. TM7x was shown to be a  
436 parasitic epibiont of *Actinomyces odontolyticus* XH001<sup>25,26,95</sup>. TM7 AC001 and PM004 were  
437 recently both co-cultured successfully with either of the host strains *Pseudopropionibacterium*  
438 *propionicum* F0230a or F0700 (not yet published). We sought to further investigate these newly  
439 discovered relationships to gain insight into possible metabolic exchange (Figure 4 B).

440 Interestingly, TM7 organisms had higher PM values than their host strains for several cell-wall  
441 components: three glucose-substituted teichoic acids, and glucose-substituted and unsubstituted  
442 glycerol teichoic acid (Figure 4 IV), suggesting that TM7 is capable of producing several cell-

443 wall components that its host cannot. Conversely, as expected, a large number of metabolites had  
444 increased PM values in the host strains compared to the TM7 strains. These metabolites are  
445 hypothesized to be easily synthesized by the host and not TM7 and are thus interesting  
446 candidates for growth supporting exchange in co-culture. Fourteen different metabolites had  
447 average PM values in the hosts greater than 0.60 higher than in the TM7 organisms (Figure 4 V).  
448 The ranked list includes: L-isoleucine, L-valine, acyl carrier protein, 5-methyltetrahydrofolate,  
449 pyridoxal phosphate, flavin adenine dinucleotide, thiamin diphosphate, putrescine, L-  
450 tryptophan, Fe<sup>2+</sup>, heme, Fe<sup>3+</sup>, L-lysine, and menaquinone-8. Interestingly, the branched chain  
451 amino acids L-isoleucine and L-valine are again at the top of the list. The correlation of amino  
452 acid biosynthesis cost<sup>72</sup> with the difference in PM values between host and TM7 is even higher  
453 than what we observed across all fastidious organisms (Spearman correlation  $\rho = 0.6011$ , P-value  
454 = 0.0051).

455 Our results provide context and putative mechanistic details related to observed gene expression  
456 and metabolic changes in TM7-host co-culture. In particular, the first and currently only  
457 published work on co-culture involving TM7 is the one on TM7x with the host *Actinomyces*  
458 *odontolyticus* XH001<sup>25,26,95</sup>. Transcriptomic data for the co-culture of TM7x and *A. odontolyticus*  
459 XH001 showed that a number of genes associated with N-acetyl-D-glucosamine were up  
460 regulated in *A. odontolyticus* in this interaction. Our results show that, although TM7 does have  
461 extensive cell wall metabolism, *A. odontolyticus* has higher PM for N-acetyl-D-glucosamine  
462 substituted components (Figure 4 VI). This suggests that the host is responsible for the  
463 biosynthesis of these cell-wall components, which may be overexpressed in co-culture.  
464 Metabolomics experiments from this co-culture have identified the cyclic peptide cyclo(L-Pro-L-  
465 Val) as a potential signaling molecule in this relationship. Our PM analysis suggests that this  
466 molecule would be synthesized by the host as it has increased PM values for both of the amino  
467 acids included (Figure 4 VII). In fact, L-valine has one of the highest discrepancies in PM for  
468 host and TM7. Finally, another potentially exchanged amino acid of interest is L-arginine. All  
469 three TM7 draft metabolic network reconstructions that we analyzed were annotated to possess  
470 either all or all but one of the reactions in the arginine deiminase pathway (TM7 PM004 is  
471 missing the arginine iminohydrolase reaction) (See also supplementary figure 6 and interactive  
472 Cytoscape<sup>96</sup> file for a representation of the full metabolic network for each TM7 strain including  
473 PM calculations for all intracellular metabolites and subnetworks of the arginine deiminase

474 pathway, Supplementary Files 1-3). This catabolic pathway can be used to degrade L-arginine to  
475 regenerate ATP, and has been implicated in syntrophic microbial interactions<sup>85,86</sup>. In our PM  
476 analysis L-arginine had consistently higher PM in host than TM7 (Figure 4 VIII). Thus, L-  
477 arginine exchange and metabolism via the arginine deiminase pathway could contribute to the  
478 dependence of TM7 on its hosts (Figure 5).

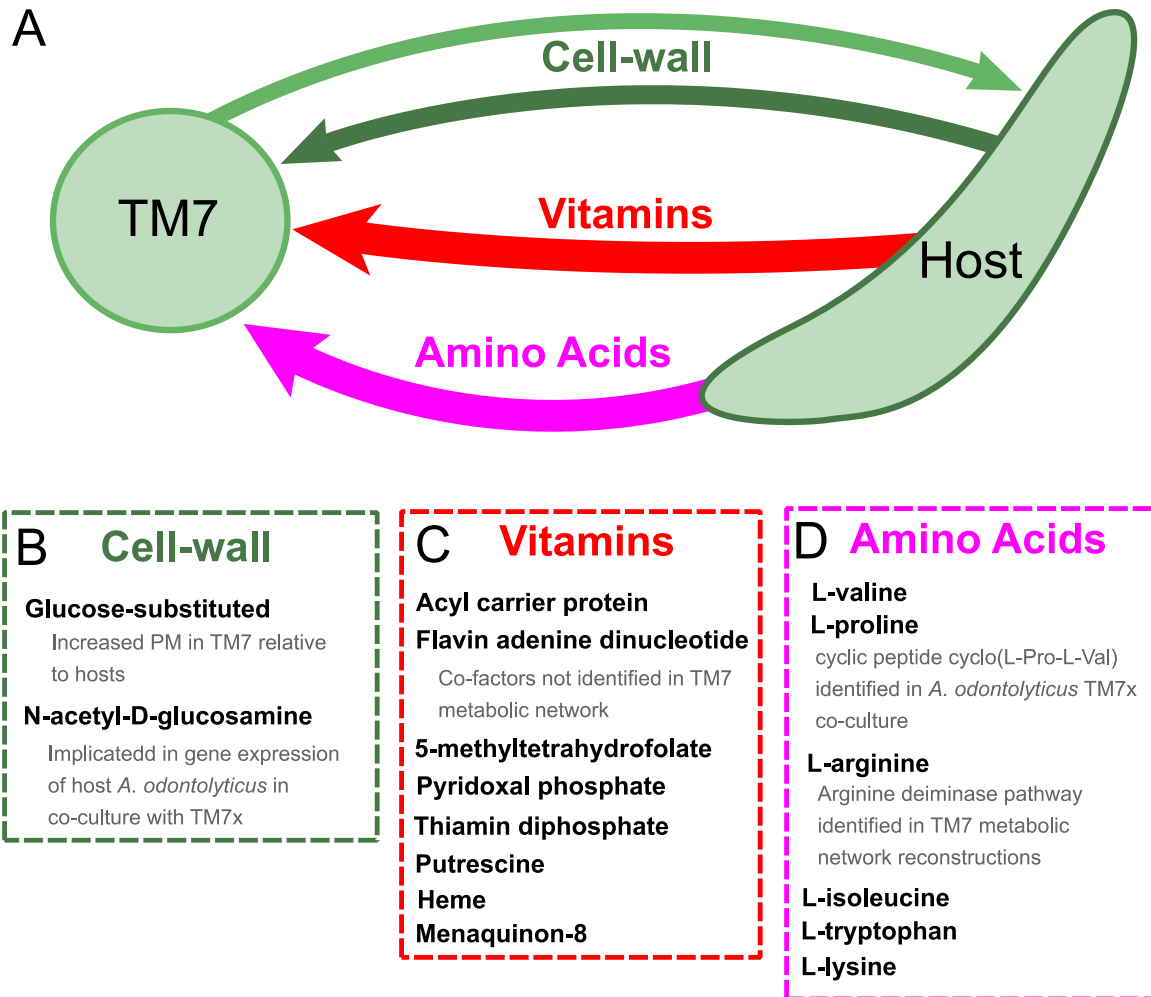

479

480 **Figure 5: Hypothesized metabolic exchange between TM7 and their bacterial hosts**

481 (A) Hypotheses were generated regarding the exchange of metabolites between TM7 species and their bacterial  
 482 hosts by comparing their producibility metric (PM) across essential biomass metabolites. Many metabolites of  
 483 different types were observed to have higher PM values in one set of organisms when compared to the other (arrows  
 484 point from high to low).

485 (B) The cell-wall components containing glucose-substituted teichoic acids were among the only metabolites with  
 486 PM higher in TM7 than in hosts. N-acetyl-D-glucosamine-substituted teichoic acids had increased PM in the host  
 487 relative to TM7, and previous gene expression data from the co-culture of TM7x and *A. odontolyticus* shows several  
 488 genes related to N-acetyl-D-glucosamine that are overexpressed in *A. odontolyticus* during co-culture<sup>25</sup>.

489 (C) Several vitamins/cofactors/other essential factors had significantly decreased PM in TM7 compared to the hosts.  
 490 The cofactors acyl carrier protein and flavin adenine dinucleotide had decreased PM in TM7, and were also not  
 491 found to be utilized in the TM7 draft metabolic network reconstructions.

492 (D) Several amino acids had significantly decreased PM in TM7 compared to the hosts. L-valine and L-proline were  
 493 both decreased in TM7 relative to the host, and previous metabolomics data from the co-culture of TM7x and *A.*  
 494 *odontolyticus* identified the cyclic dipeptide cyclo(L-Pro-L-Val) as a potential signaling molecule<sup>25</sup>. L-arginine had  
 495 decreased PM in TM7 relative to the host and could potentially be exchanged and catabolized by TM7 via the  
 496 arginine deiminase pathway.

## 497 **Discussion**

498 We have developed a novel method for analyzing the biosynthetic capabilities of microbial  
499 organisms based on draft metabolic networks reconstructed directly from genomic information.  
500 Our method provides a preliminary assessment of the biosynthetic capabilities of a metabolic  
501 network model, without the need for gap-filling, that can be used to gain biological insight and  
502 evaluate initial model performance. The concept we define, biosynthetic network robustness,  
503 provides an environment-independent evaluation and utilizes all available stoichiometric  
504 constraints. Environmental independence is achieved by randomly sampling many possible  
505 nutrient combinations in a probabilistic manner and computing a metric inspired by percolation  
506 theory. This measure defines the robustness with which an organism can produce a given  
507 metabolite from any random set of precursors and thus avoids the issue of metabolite  
508 producibility being inherently dependent on environment<sup>49,50</sup>. In this work we have chosen to  
509 calculate the metabolic properties of organisms without assuming a particular environment;  
510 however, future implementations could utilize environmental information in a probabilistic  
511 manner when appropriate. Additionally, we have analyzed the production of individual target  
512 metabolites, but our method could easily be extended to sets of metabolites such as the  
513 simultaneous production of all biomass components. Our method utilizes all available  
514 stoichiometric constraints of the metabolic network as opposed to an adjacency matrix used by  
515 alternative approaches<sup>48</sup>. Stoichiometric constraints are implemented with a modified version of  
516 flux balance analysis (See methods section algorithm functions: *feas*), as opposed to the  
517 alternative network expansion algorithm to avoid the dependence on cofactors as bootstrapping  
518 metabolites<sup>97</sup>.

519 It is important to highlight that several assumptions are made in the representation of enzymatic  
520 reactions as a network that generally limit metabolic network analysis methods. The primary  
521 limitation is in enzyme annotation. Aside from missing or incorrect annotations, subtle processes  
522 such as enzyme promiscuity and spontaneous reactions may have unquantified effects on  
523 metabolic network function. Reaction direction/reversibility is also difficult to predict as it  
524 requires detailed knowledge of reaction thermodynamics and metabolite concentrations. In  
525 particular, inaccurate or missing information about reaction direction/reversibility could lead to  
526 uncertainty about whether a high PM from our method should be interpreted as reflecting

527 biosynthetic or degradative capabilities (or both). Throughout our analysis we have utilized  
528 default reversibility constraints provided by the KBase build metabolic models app<sup>45,70,71</sup>, but  
529 more stringent constraints on directionality could possibly improve our results. Additionally, as  
530 our method analyzes local properties of the metabolic network (the PM value for a specific  
531 metabolite) unidentified gaps in biosynthetic pathways that occur in close proximity to the target  
532 metabolite of interest could lead to incorrect predictions regarding microbial auxotrophy. In  
533 general, all metabolic network analysis methods face similar limitations. Even as newly  
534 developed experimental methods gradually improve metabolic reaction annotation<sup>98-101</sup>, it is  
535 likely that we will have to continue dealing with incomplete knowledge. Thus, approaches such  
536 as ours are valuable for initial assessment of metabolic capabilities with minimal arbitrary  
537 assumptions, and unexpected modeling results can help to pinpoint specific areas in need of  
538 refinement.

539 In applying our method to the human oral microbiome, we computed an atlas of biosynthetic  
540 capabilities across organisms that can be mined for relevant biological insight. Overall, many of  
541 our predictions were consistent with known patterns such as the reduction in biosynthetic  
542 capabilities in the genus *Mycoplasma* or the distribution of lipids and cell-wall components in  
543 Gram-positive and negative organisms. Additionally, unexpected predictions served as  
544 opportunities to highlight novel biological patterns or emphasize areas of the metabolic network  
545 that merit additional attention in the network reconstruction process. Our focus was on fastidious  
546 and uncultivated organisms in particular, and using our method we highlighted a unique cluster  
547 of such organisms with reduced biosynthetic capabilities. This cluster included three previously  
548 uncultivated *Saccharibacteria* (TM7) phylum organisms that were recently successfully co-  
549 cultured with growth supporting bacterial host organisms. Our method singled out specific  
550 biosynthetic capabilities of these organisms, and was used to develop hypotheses regarding  
551 metabolic exchange between TM7 and host bacteria that give context to existing co-culture data  
552 and should be further testable in future experiments. These three TM7 species are the first  
553 successfully cultured organisms from the candidate phyla radiation and therefore are of general  
554 interest beyond their role in human oral health. In fact, the recent identification of the candidate  
555 phyla radiation demonstrates the broad prevalence across the tree of life of reduced-genome  
556 organisms that potentially rely on their community context for metabolic supplementation<sup>15-17</sup>.

557 Further analysis of these organisms with our method could continue to provide insight into their  
558 unique metabolic properties.

559 By quickly translating genotype into phenotype with minimal assumptions, our approach has the  
560 potential to serve as a baseline estimate of metabolic mechanisms in different microbial  
561 communities and allows us to more easily decipher microbial community structure and function.  
562 Our method can be easily applied other human-associated or environmentally relevant microbial  
563 communities, providing valuable putative insight into inter-microbial metabolic dependencies,  
564 that could be used to interpret existing data or design future experiments. In particular, we  
565 envisage that this type of metabolic insight could help bridge the gap between correlation studies  
566 and a mechanistic understanding of microbial community metabolism and dynamics.



## 567 **Methods**

### 568 ***Method implementation***

569 The framework for implementing our method was developed as several different modular  
570 functions that interact in a nested manner to run our analysis. The structure of these functions  
571 and their associated variables is described in Supplementary Figure 7 via a code diagram. The  
572 functions are written in MATLAB and interface with the COBRA toolbox<sup>63,64</sup>. The code is built  
573 around the COBRA toolbox commands *changeObjective* and *optimizeCbModel*. Thus, running  
574 our code requires installation of the COBRA toolbox. Additionally, the nonlinear fitting function  
575 utilizes the MATLAB function *lsqnonlin* for nonlinear least squared fitting. Additional functions  
576 were developed to implement our probabilistic framework and run our analysis method. Any of  
577 these functions could be replaced with alternative modules that improve or expand upon the  
578 algorithm in the future. We describe here each modular function, providing details on the  
579 computations performed. The full code for implementing our method is available online at  
580 [https://github.com/segrelab/biosynthetic\\_network\\_robustness](https://github.com/segrelab/biosynthetic_network_robustness).

### 581 ***Algorithm functions***

582 *feas* – This function determines if the production of a given target metabolite set is feasible given  
583 the metabolic network model with specified constraints. Flux balance analysis was used to  
584 determine the feasibility of production<sup>46</sup>. Flux balance analysis was chosen over the alternative  
585 network expansion algorithm due to its treatment of cofactor metabolites<sup>97</sup>. In network  
586 expansion, cofactors must be added to the network to “bootstrap” metabolism, whereas in flux  
587 balance analysis any reaction utilizing a cofactor can proceed given that the cofactor can be  
588 recycled by a different reaction, which is a less restrictive constraint on the metabolic network  
589 flux. Furthermore, our implementation allows for inequality or equality mass balance constraints.  
590 Traditional flux balance imposes an equality mass balance which is often referred to as a steady  
591 state constraint. This constraint restricts the rate of change of all metabolite concentrations to be  
592 equal to 0. We provide the option of implementing inequality mass balance, which constrains the  
593 rate of change of metabolite concentrations to be greater than or equal to 0. In practice,  
594 inequality mass balance is implemented by adding unbounded exporting exchange reactions and  
595 calculating steady state solutions. We have implemented inequality mass balance for all of our  
596 calculations due to the fact that we are analyzing local properties of the metabolic network (the

597 production of a single metabolite) and do not want the network to be constrained by the global  
598 requirement to achieve steady state. During the production of a particular metabolite, the  
599 metabolic network is thus free to produce byproducts that are used elsewhere or secreted. To  
600 determine production feasibility, the export of a particular target metabolite is set to the objective  
601 function and maximized. If the maximal flux is greater than a hard-coded threshold ( $>0.001$ ),  
602 then the target metabolite is considered to be feasibly produced. This function uses the COBRA  
603 commands *changeObjective* and *optimizeCbModel* to set and maximize the appropriate objective  
604 function. Mathematically, flux balance analysis is implemented as a linear programming problem  
605 with the following definition:

$$\begin{aligned} 606 \quad & \textbf{maximize: } C^T v \\ 607 \quad & \textbf{subject to: } Sv = 0 \text{ (equality mass balance); or } Sv \geq 0 \text{ (inequality mass balance)} \\ 608 \quad & \textbf{and subject to: } lb \leq v \leq ub \end{aligned}$$

609 Where:  $C^T$  is the transpose of a column vector indicating which reactions are to be maximized.  
610 In this case, this specifies the exporting exchange reactions corresponding to the target  
611 metabolites.  $v$  is a column vector of metabolic reaction fluxes.  $S$  is the stoichiometric matrix  
612 describing the reactions present in the metabolic network. This is a metabolites by reactions size  
613 matrix. Each element in the matrix is the stoichiometry of a particular metabolite associated with  
614 a particular reaction. Negative values indicate that a metabolite is a reactant of that reaction  
615 being consumed, while positive values indicate that a metabolite is a product of that reaction  
616 being produced.  $lb$  and  $ub$  are the lower and upper bounds of all reactions, which define reaction  
617 reversibility or are set to -1000 and 1000 respectively when unbounded. Additional information  
618 on flux balance analysis can be found in this publication describing its implementation in  
619 detail<sup>46</sup>.

620 ***rand\_add*** – This function is designed to give a random sample of input metabolites to be added  
621 based on the Bernoulli parameter for each input metabolite. This function uses the MATLAB  
622 *rand* function to choose a random number between 0 and 1 for each input metabolite. If this  
623 number is less than the Bernoulli parameter for that input metabolite, then the metabolite is  
624 added.

625 ***prob*** – This function utilizes *rand\_add* and *feas* to determine the probability of producing the  
626 target metabolite given the input metabolite Bernoulli parameters, the metabolic network  
627 structure, and the specified constraints. A chosen number of random samples of input  
628 metabolites are generated by repeatedly running the *rand\_add* function. The probability of  
629 producing the target metabolite is determined as the number of feasible trials divided by the total  
630 number of samples. The default number of samples used for the bulk of the analysis in this work  
631 was 50.

632 ***calc\_PM\_fit\_nonlin*** – This function calculates the PM for a specified metabolic network model  
633 and metabolite using an efficient nonlinear fitting technique. The nonlinear fitting algorithm  
634 estimates the PM by randomly sampling points on the PC that fall near PM. The algorithm starts  
635 by sampling a point in the middle of the PC and then using the MATLAB function *lsqnonlin* to  
636 fit a sigmoidal curve to the sampled points of the PC. The fit sigmoidal curve is used to estimate  
637 the PM. Next, a new sample point is obtained which is offset from the estimated PM value with  
638 some noise introduced with the specified noise parameter. In this way the algorithm converges  
639 on the PM value and samples points around PM, thus increasing the accuracy of its estimate with  
640 each iteration. The estimate converges when a specified n estimates of the PM value are all  
641 within a specified threshold. The code allows for a figure to be displayed which shows the  
642 sampled data points and fit sigmoidal functions, which is useful for debugging the algorithm and  
643 finding suitable parameters. The default parameters, associated with this function, used for the  
644 bulk of our analysis were: noise = 0.3, n = 7, thresh = 0.01. The parameters chosen were selected  
645 by hand to provide good performance.

646 ***prep\_mod*** – This function is used to prepare the metabolic network model for analysis with our  
647 method. The input for this function is a COBRA model, which is saved as a MATLAB structure  
648 variable. This code has been developed and optimized to work with KBase generated metabolic  
649 networks and is not guaranteed to work with networks from other sources that have different  
650 naming conventions. The first modification to the networks is to find and turn off all exchange  
651 and maintenance reactions to standardize the network models. Second, the extracellular and  
652 intracellular metabolites are identified based on naming conventions and output from the  
653 function. Third, exchange reactions are added for each metabolite (producing 1 unit of that  
654 metabolite), and a vector indicating the mapping from metabolites to these exchange reactions is

655 output from the function. This vector is used by our method to control the presence and absence  
656 of input metabolites in the network model as well as to adjust the inequality mass balance  
657 constraints. The final output is a new network model which has been standardized for our  
658 method and in which the presence and absence of metabolites can be easily manipulated.

659 *find\_PM\_mods\_mets* – This function is designed to facilitate the parallelization of the PM  
660 calculation. The function takes as inputs a directory of metabolic network models, a directory to  
661 store results, a list of target metabolite names, the index of the current network model and  
662 metabolite being analyzed and all of the specifications necessary for running  
663 *calc\_PM\_fit\_nonlin*. The metabolite and model being analyzed can be changed dynamically to  
664 allow for parallelization. In addition to these inputs, this function has several inputs that allow  
665 for standard modifications to the PM calculation procedure. It allows for certain metabolites to  
666 be fixed on or off. It allows for several choices of metabolites to be added during the PM  
667 calculation process, including adding all intracellular or extracellular metabolites and including  
668 the target metabolite or not. It also allows for specification of the inequality mass balance  
669 constraint as either all metabolites set to inequality mass balance or all metabolites set to equality  
670 mass balance. Furthermore, it has a parameter for the number of runs to calculate the PM to  
671 obtain statistics regarding the variability of *calc\_PM\_fit\_nonlin*. For the analysis done in this  
672 work: calculation of PM for single metabolites was done by adding all intracellular metabolites  
673 (excluding targets). The mass balance constraint was set to use inequality constraints for all  
674 metabolites. The number of runs was set to 10.

### 675 ***Parallelization***

676 We used the Boston University shared computing cluster to run our analysis for a large number  
677 of metabolic networks and metabolites. The calculation of the PM for each individual network  
678 model and metabolite can be run in parallel, vastly increasing the number of possible  
679 computations. The average runtime for computing the PM for an individual network and  
680 metabolite for 10 repeated runs was ~9 minutes and the maximum run time was ~45 minutes,  
681 given the default parameters used in this study:  $a = 0$ ,  $s = 1$ ,  $\text{samp} = 50$ ,  $\text{noise} = 0.3$ ,  $n = 7$ ,  $\text{thresh}$   
682  $= 0.01$ ,  $\text{runs} = 10$ .

### 683 ***Analysis of the E. coli core metabolic network***

684 Our analysis method was initially demonstrated on the *E. coli* core metabolic network. We used  
685 the network provided by the BiGG database<sup>102</sup>. We calculated the PM value for each intracellular  
686 metabolite. The input metabolites for our PM calculations were assigned as all intracellular  
687 metabolites. This was the most naïve assumption we could use for assigning input metabolites.  
688 Additionally, using intracellular metabolites as input metabolites avoids errors that could arise  
689 from poorly annotated transporters in draft metabolic network reconstructions. Calculations were  
690 performed using the Boston University shared computing cluster to parallelize runs across  
691 networks and metabolites and improve computation time. The results of our simulation were  
692 visualized using the Cytoscape network visualization software<sup>96</sup>. The entire *E. coli* core  
693 metabolic network is shown, excluding the biomass reaction for clarity.

#### 694 ***Reconstruction of human oral microbiome metabolic networks***

695 A set of 456 draft metabolic networks were reconstructed for oral microbiome strains. Strains  
696 were chosen to match the sequences chosen for dynamic annotation on HOMD which cover at  
697 least one strain for each sequenced species and repeated strains for sequences of particular  
698 interest for the human oral microbiome. Several strains were additionally selected due to our  
699 interest in fastidious and uncultivated organisms. These included 8 uncultivated or recently co-  
700 cultured strains. When considering the taxa TM7 and *Tannerella* sp. oral taxon 286, we chose to  
701 include the most recent genome sequences from oral microbiome co-culture experiments,  
702 although there are several additional single-cell and metagenome assembled sequences also  
703 available for *Tannerella* sp. oral taxon 286 and TM7 in particular<sup>15, 29, 103–105</sup>. The host strains  
704 *Actinomyces odontolyticus* XH001, *Pseudopropionibacterium propionicum* F0700, and  
705 *Pseudopropionibacterium propionicum* F0230a were included due to their support of TM7  
706 organisms in co-culture. All genomes were either found in the KBase central data repository or  
707 manually annotated with RAST and uploaded to KBase<sup>70, 71, 106, 107</sup>. Strains that were dynamically  
708 annotated on HOMD but could not be found on KBase, were not of interest due to  
709 uncultivability, and already had a representative strain from their matching species were not  
710 included in our set of strains. Several naming discrepancies existed between KBase and HOMD,  
711 which are highlighted in the KBase download notes column of Supplementary Table 1. All  
712 metabolic networks were reconstructed using a KBase narrative containing all of the genomes  
713 and metabolic networks from this work, which is available to be copied, viewed, edited, or

714 shared at <https://narrative.kbase.us/narrative/ws.27853.obj.935>. Metabolic networks were  
715 reconstructed for each strain with automatic assignment of Gram-stain, and without gap-filling.  
716 Metabolic network reconstructions were then downloaded from KBase as SBML files and  
717 converted to COBRA .mat files using the COBRA command *readCbModel*. Metadata related to  
718 all organisms and metabolic networks are available in Supplementary Table 1.

### 719 *Large-scale analysis of biosynthetic capabilities across the human oral microbiome*

720 We investigated the large-scale biosynthetic properties of the human oral microbiome by  
721 analyzing reconstructed metabolic networks for 456 different oral microbiome strains. For each  
722 metabolic network we calculated the PM value for 88 individual biomass components (40,128  
723 total PM calculations). The biomass components were chosen to be the union of the set of default  
724 KBase Gram-positive and Gram-negative biomass compositions (see Supplementary Table 2 for  
725 details). The metabolites sulfate and phosphate were not included, while the metabolite H<sub>2</sub>O was  
726 included as a positive control. The calculations were parallelized across metabolic networks and  
727 metabolites using the Boston University shared computing cluster to improve computation time.  
728 The PM values were stored as a matrix of organisms by metabolites PM values. This matrix was  
729 analyzed using hierarchical bi-clustering based on average differences between groups. The  
730 matrix was clustered and visualized using the R package *pheatmap*.

731 For the comparison of average PM values and genome size, genome size was taken from KBase  
732 and added to Supplementary Table 1. We used regression modeling to identify the broad  
733 relationship between genome size, taxonomy, and the average PM value. We fit PM values to  
734 linear and quadratic models of log genome size:

$$735 \quad \text{Linear: } average(PM) = c1 + c2 * \log(genome\ size)$$

$$736 \quad \text{Quadratic: } average(PM) = c1 + c2 * \log(genome\ size) + c3 * \log(genome\ size)^2$$

737 Nominal taxonomic parameters were added to these models to determine if they could improve  
738 the models prediction of PM values. Gram-stain was assigned based on KBase default  
739 assignments. Phylum, and Class were assigned based on human oral microbiome database  
740 taxonomy annotations. Regression models were developed using the MATLAB command *fitlm*.  
741 The AIC and BIC were calculated to assess model improvement upon subsequent addition of  
742 taxonomic parameters by determining if the likelihood of the model was improved while

743 including a penalty term for each additional independent variable. Independent variables were  
744 added for each additional nominal parameter added (for example: adding the predictor of phyla  
745 meant adding 12 independent variables, one for each different phylum). The AIC and BIC were  
746 calculated using the MATLAB command *aicbic*.

#### 747 ***Capturing specific biosynthetic patterns across human oral microbiome organisms***

748 We investigated specific trends in metabolite PM values related to taxonomy by analyzing the  
749 clustered matrix of PM values. Additionally, a similar regression model was used to provide  
750 quantitative insight. The base model was a quadratic model using the log of genome size as the  
751 predictor of the specific PM value for a certain metabolite across all organisms:

$$752 \quad PM(\text{metabolite}) = c1 + c2 * \log(\text{genome size}) + c3 * \log(\text{genome size})^2$$

753 Nominal taxonomic parameters were added one at a time. Taxonomic parameters of Gram-stain  
754 (+ or -), phylum (belonging to 1 of 12 phyla or not) and class (belonging to 1 of 22 classes or  
755 not) were used. We calculated the log likelihood ratio by taking difference between the log  
756 likelihood of the base quadratic model of genome size and the model including a specific  
757 taxonomic parameter. We identified highly significant relationships using an alpha value of  $10^{-6}$   
758 and Bonferroni correction for multiple hypothesis testing.

#### 759 ***Uncovering biosynthetic deficiencies in fastidious human oral microbiome organisms***

760 A subset of fastidious organisms identified from the larger clustered matrix of all oral  
761 microbiome organisms PM values were re-clustered and analyzed further. The clustering method  
762 used was the same as for the larger Figure 3. Additionally, three previously uncultivated TM7  
763 organisms (TM7x, AC001, and PM004) and several host strains for the uncultivated TM7  
764 (*Actinomyces odontolyticus* XH001, *Pseudopropionibacterium propionicum* F0700, and  
765 *Pseudopropionibacterium propionicum* F0230a) were re-clustered and analyzed. Metabolites  
766 were ranked and analyzed based on the difference between the average PM value of separate  
767 groups. Three different ranking were used throughout this analysis 1) average fastidious cluster  
768 organisms PM subtracted from average oral microbiome organisms PM 2) average *Mycoplasma*  
769 PM subtracted from average TM7 PM 3) average TM7 host PM subtracted from TM7 PM.  
770 Correlations between amino acid biosynthetic cost<sup>72</sup> and difference in PM were calculated using  
771 Spearman's rank correlation and the MATLAB command *corr*.

## 772 **Acknowledgments**

773 We would like to acknowledge our collaborators at the Forsyth institute for providing valuable  
774 knowledge and insight into the human oral microbiome and uncultivated microorganisms. We  
775 would also like to acknowledge all of the members of the Segrè lab and Daniel Sher of Haifa  
776 University for helpful discussions and comments on this work. Research reported in this  
777 publication was supported by The National Institute of Dental and Craniofacial Research of the  
778 National Institutes of Health under award numbers R37DE016937, R01DE024468, by National  
779 Institutes of Health grants R01GM121950 and Sub\_P30DK036836\_P&F, by the Defense  
780 Advanced Research Projects Agency (Purchase Request No. HR0011515303, Contract No.  
781 HR0011-15-C-0091), the U.S. Department of Energy (DE-SC0012627), the Boston University  
782 Interdisciplinary Biomedical Research Office, and by the Boston University training program in  
783 quantitative biology and physiology under Ruth L. Kirschstein National Research Service Award  
784 T32GM008764 from the National Institute of General Medical Sciences. The content is solely  
785 the responsibility of the authors and does not necessarily represent the official views of the  
786 granting agencies.

## 787 **Competing Interests**

788 The authors declare that they have no competing interests.

## 789 **References**

- 790 1. Ponomarova O, Patil KR. Metabolic interactions in microbial communities: Untangling the Gordian knot.  
791 *Curr Opin Microbiol.* 2015;27:37-44. doi:10.1016/j.mib.2015.06.014
- 792 2. Phelan V V, Liu W-T, Pogliano K, Dorrestein PC. Microbial metabolic exchange—the chemotype-to-  
793 phenotype link. *Nat Chem Biol.* 2011;8(1):26-35. doi:10.1038/nchembio.739
- 794 3. Watrous JD, Phelan V V., Hsu CC, Moree WJ, Duggan BM, Alexandrov T, Dorrestein PC. Microbial  
795 metabolic exchange in 3D. *ISME J.* 2013;7(4):770-780. doi:10.1038/ismej.2012.155
- 796 4. Harcombe WR, Riehl WJ, Dukovski I, Granger BR, Betts A, Lang AH, Bonilla G, Kar A, Leiby N, Mehta  
797 P, Marx CJ, Segrè D. Metabolic resource allocation in individual microbes determines ecosystem  
798 interactions and spatial dynamics. *Cell Rep.* 2014;7(4):1104-1115. doi:10.1016/j.celrep.2014.03.070
- 799 5. Embree M, Liu JK, Al-Bassam MM, Zengler K. Networks of energetic and metabolic interactions define  
800 dynamics in microbial communities. *Proc Natl Acad Sci.* 2015;112(50):15450-15455.  
801 doi:10.1073/pnas.1506034112
- 802 6. Goldford JE, Lu N, Bajic D, Estrela S, Tikhonov M, Sanchez-Gorostiaga A, Segrè D, Mehta P, Sanchez A.  
803 Emergent Simplicity in Microbial Community Assembly. *bioRxiv.* 2017:205831. doi:10.1101/205831
- 804 7. Mee MT, Collins JJ, Church GM, Wang HH. Syntrophic exchange in synthetic microbial communities. *Proc*  
805 *Natl Acad Sci.* 2014;111(20):E2149-E2156. doi:10.1073/pnas.1405641111



- 806 8. Pande S, Shitut S, Freund L, Westermann M, Bertels F, Colesie C, Bischofs IB, Kost C. Metabolic cross-  
807 feeding via intercellular nanotubes among bacteria. *Nat Commun*. 2015;6:1-13. doi:10.1038/ncomms7238
- 808 9. D'Souza G, Shitut S, Preussger D, Yousif G, Waschina S, Kost C. Ecology and evolution of metabolic  
809 cross-feeding interactions in bacteria. *Nat Prod Rep*. 2018;35(5):455-488. doi:10.1039/c8np00009c
- 810 10. Zengler K, Zaramela LS. The social network of microorganisms - How auxotrophies shape complex  
811 communities. *Nat Rev Microbiol*. 2018;16(6):383-390. doi:10.1038/s41579-018-0004-5
- 812 11. Epstein SS. The phenomenon of microbial uncultivability. *Curr Opin Microbiol*. 2013;16(5):636-642.  
813 doi:10.1016/j.mib.2013.08.003
- 814 12. Staley JT. Microorganisms in Aquatic and Terrestrial Habitats. *Annu reviews Microbiol*. 1985;(39):321-346.
- 815 13. Stewart EJ. Growing unculturable bacteria. *J Bacteriol*. 2012;194(16):4151-4160. doi:10.1128/JB.00345-12
- 816 14. Pande S, Kost C. Bacterial Unculturability and the Formation of Intercellular Metabolic Networks. *Trends*  
817 *Microbiol*. 2017;25(5):349-361. doi:10.1016/j.tim.2017.02.015
- 818 15. Kantor RS, Wrighton KC, Handley KM, Sharon I, Hug LA, Castelle CJ, Thomas BC, Banfield JF. Small  
819 genomes and sparse metabolisms of sediment-associated bacteria from four candidate phyla. *MBio*.  
820 2013;4(5):1-11. doi:10.1128/mBio.00708-13
- 821 16. Brown CT, Hug LA, Thomas BC, Sharon I, Castelle CJ, Singh A, Wilkins MJ, Wrighton KC, Williams KH,  
822 Banfield JF. Unusual biology across a group comprising more than 15% of domain Bacteria. *Nature*.  
823 2015;523(7559):208-211. doi:10.1038/nature14486
- 824 17. Hug LA, Baker BJ, Anantharaman K, Brown CT, Probst AJ, Castelle CJ, Butterfield CN, Hermsdorf AW,  
825 Amano Y, Ise K, Suzuki Y, Dudek N, Relman DA, Finstad KM, Amundson R, Thomas BC, Banfield JF. A  
826 new view of the tree of life. *Nat Microbiol*. 2016;1(5):16048. doi:10.1038/nmicrobiol.2016.48
- 827 18. Dewhirst FE, Chen T, Izard J, Paster BJ, Tanner ACR, Yu WH, Lakshmanan A, Wade WG. The human oral  
828 microbiome. *J Bacteriol*. 2010;192(19):5002-5017. doi:10.1128/JB.00542-10
- 829 19. Wade WG. The oral microbiome in health and disease. *Pharmacological Res*. 2013;69(1):137-143.  
830 doi:10.1007/978-3-319-25091-5\_10
- 831 20. Kolenbrander PE, Palmer RJ, Periasamy S, Jakubovics NS. Oral multispecies biofilm development and the  
832 key role of cell-cell distance. *Nat Rev Microbiol*. 2010;8(7):471-480. doi:10.1038/nrmicro2381
- 833 21. Mark Welch JL, Rossetti BJ, Rieken CW, Dewhirst FE, Borisy GG. Biogeography of a human oral  
834 microbiome at the micron scale. *Proc Natl Acad Sci*. 2016;113(6):E791-E800.  
835 doi:10.1073/pnas.1522149113
- 836 22. Chen T, Yu W-HW-H, Izard J, Baranova O V., Lakshmanan A, Dewhirst FE. The Human Oral Microbiome  
837 Database: a web accessible resource for investigating oral microbe taxonomic and genomic information.  
838 *Database*. 2010;2010(0):baq013-baq013. doi:10.1093/database/baq013
- 839 23. Krishnan K, Chen T, Paster BJ. A practical guide to the oral microbiome and its relation to health and  
840 disease. *Oral Dis*. 2017;23(3):276-286. doi:10.1111/odi.12509
- 841 24. Siqueira JF, Rôças IN. As-yet-uncultivated oral bacteria: Breadth and association with oral and extra-oral  
842 diseases. *J Oral Microbiol*. 2013;5(2013):1-14. doi:10.3402/jom.v5i0.21077
- 843 25. He X, McLean JS, Edlund A, Yooseph S, Hall AP, Liu S-Y, Dorrestein PC, Esquenazi E, Hunter RC, Cheng  
844 G, Nelson KE, Lux R, Shi W. Cultivation of a human-associated TM7 phylotype reveals a reduced genome  
845 and epibiotic parasitic lifestyle. *Proc Natl Acad Sci*. 2015;112(1):244-249. doi:10.1073/pnas.1419038112
- 846 26. Bor B, Poweleit N, Bois JS, Cen L, Bedree JK, Zhou ZH, Gunsalus RP, Lux R, McLean JS, He X, Shi W.  
847 Phenotypic and Physiological Characterization of the Epibiotic Interaction Between TM7x and Its Basibiont  
848 Actinomyces. *Microb Ecol*. 2016;71(1):243-255. doi:10.1007/s00248-015-0711-7

- 849 27. Brinig MM, Lepp PW, Ouverney CC, Armitage GC, Relman DA. Prevalence of bacteria of division TM7 in  
850 human subgingival plaque and their association with disease. *Appl Environ Microbiol.* 2003;69(3):1687-  
851 1694. doi:10.1128/AEM.69.3.1687-1694.2003
- 852 28. Ouverney CC, Armitage GC, Relman DA. Single-Cell Enumeration of an Uncultivated TM7 Subgroup in  
853 the Human Subgingival Crevice. *Appl Environ Microbiol.* 2003;69(10):6294-6298.  
854 doi:10.1128/AEM.69.10.6294-6298.2003
- 855 29. Marcy Y, Ouverney C, Bik EM, Losekann T, Ivanova N, Martin HG, Szeto E, Platt D, Hugenholtz P,  
856 Relman DA, Quake SR. Dissecting biological “dark matter” with single-cell genetic analysis of rare and  
857 uncultivated TM7 microbes from the human mouth. *Proc Natl Acad Sci.* 2007;104(29):11889-11894.  
858 doi:10.1073/pnas.0704662104
- 859 30. Widder S, Allen RJ, Pfeiffer T, Curtis TP, Wiuf C, Sloan WT, Cordero OX, Brown SP, Momeni B, Shou W,  
860 Kettle H, Flint HJ, Haas AF, Laroche B, Kreft J-U, Rainey PB, Freilich S, Schuster S, Milferstedt K, et al.  
861 Challenges in microbial ecology: building predictive understanding of community function and dynamics.  
862 *ISME J.* 2016;10(11):2557-2568. doi:10.1038/ismej.2016.45
- 863 31. Schuster S, Fell DA, Dandekar T. A general definition of metabolic pathways useful for systematic  
864 organization and analysis of complex metabolic networks. *Nat Biotech.* 2000;18(March).  
865 <http://dx.doi.org/10.1038/73786>
- 866 32. Oberhardt MA, Palsson B, Papin JA. Applications of genome-scale metabolic reconstructions. *Mol Syst*  
867 *Biol.* 2009;5(320):1-15. doi:10.1038/msb.2009.77
- 868 33. Lewis NE, Nagarajan H, Palsson BØ. Constraining the metabolic genotype-phenotype relationship using a  
869 phylogeny of in silico methods. *Nat Rev Microbiol.* 2013;8(4):291-305.  
870 doi:10.1038/nrmicro2737.Constraining
- 871 34. Stoliar S, Van Dien S, Hillesland KL, Pinel N, Lie TJ, Leigh JA, Stahl DA. Metabolic modeling of a  
872 mutualistic microbial community. *Mol Syst Biol.* 2007;3(92):1-14. doi:10.1038/msb4100131
- 873 35. Klitgord N, Segrè D. Environments that Induce Synthetic Microbial Ecosystems. *PLoS Comput Biol.*  
874 2010;6(11):e1001002. doi:10.1371/journal.pcbi.1001002
- 875 36. Freilich S, Zarecki R, Eilam O, Segal ES, Henry CS, Kupiec M, Gophna U, Sharan R, Ruppin E.  
876 Competitive and cooperative metabolic interactions in bacterial communities. *Nat Commun.* 2011;2:589.  
877 doi:10.1038/ncomms1597
- 878 37. Zelezniak A, Andrejev S, Ponomarova O, Mende DR, Bork P, Patil KR. Metabolic dependencies drive  
879 species co-occurrence in diverse microbial communities. *Proc Natl Acad Sci.* 2015;112(51):201522642.  
880 doi:10.1073/pnas.1522642113
- 881 38. Ji B, Nielsen J. From next-generation sequencing to systematic modeling of the gut microbiome.  
882 2015;6(June):1-9. doi:10.3389/fgene.2015.00219
- 883 39. Biggs MB, Medlock GL, Kolling GL, Papin JA. Metabolic network modeling of microbial communities.  
884 *Wiley Interdiscip Rev Syst Biol Med.* 2015;7(5):317-334. doi:10.1002/wsbm.1308
- 885 40. Zomorodi AR, Segrè D. Synthetic Ecology of Microbes: Mathematical Models and Applications. *J Mol*  
886 *Biol.* 2016;428(5):837-861. doi:10.1016/j.jmb.2015.10.019
- 887 41. Magnúsdóttir S, Heinken A, Kutt L, Ravcheev DA, Bauer E, Noronha A, Greenhalgh K, Jäger C, Baginska  
888 J, Wilmes P, Fleming RMT, Thiele I. Generation of genome-scale metabolic reconstructions for 773  
889 members of the human gut microbiota. *Nat Biotechnol.* 2017;35(1):81-89. doi:10.1038/nbt.3703
- 890 42. Magnúsdóttir S, Thiele I. Modeling metabolism of the human gut microbiome. *Current Opinion in*  
891 *Biotechnology.* 2018. doi:10.1016/j.copbio.2017.12.005
- 892 43. Pacheco AR, Moel M, Segrè D. Costless metabolic secretions as drivers of interspecies interactions in  
893 microbial ecosystems. 2018:1-42. doi:10.1101/300046

- 894 44. Feist AM, Herrgård MJ, Thiele I, Reed JL, Palsson B. Reconstruction of biochemical networks in  
895 microorganisms. *Nat Rev Microbiol.* 2009;7(2):129-143. doi:10.1038/nrmicro1949
- 896 45. Henry CS, DeJongh M, Best AA, Frybarger PM, Linsay B, Stevens RL. High-throughput generation,  
897 optimization and analysis of genome-scale metabolic models. *Nat Biotechnol.* 2010;28(9):977-982.  
898 doi:10.1038/nbt.1672
- 899 46. Orth JD, Thiele I, Palsson BØ. What is flux balance analysis? *Nat Biotechnol.* 2010;28(3):245-248.  
900 doi:10.1038/nbt.1614.What
- 901 47. Mahadevan R, Edwards JS, Doyle FJ. Dynamic Flux Balance Analysis of diauxic growth in *Escherichia*  
902 *coli*. *Biophys J.* 2002;83(3):1331-1340. doi:10.1016/S0006-3495(02)73903-9
- 903 48. Borenstein E, Kupiec M, Feldman MW, Ruppin E. Large-scale reconstruction and phylogenetic analysis of  
904 metabolic environments. *Proc Natl Acad Sci.* 2008;105(38):14482-14487. doi:10.1073/pnas.0806162105
- 905 49. Ebenhöf O, Handorf T, Heinrich R. Structural analysis of expanding metabolic networks. *Genome Inform.*  
906 2004;15(1):35-45. doi:10.11234/GI1990.15.35
- 907 50. Handorf T, Ebenhöf O, Heinrich R. Expanding metabolic networks: Scopes of compounds, robustness, and  
908 evolution. *J Mol Evol.* 2005;61(4):498-512. doi:10.1007/s00239-005-0027-1
- 909 51. Basler G, Nikoloski Z, Ebenhöf O, Handorf T. Biosynthetic potentials from species-specific metabolic  
910 networks. *Genome Inform.* 2008;20:135-148. <http://www.ncbi.nlm.nih.gov/pubmed/19425129>.
- 911 52. Matthäus F, Salazar C, Ebenhöf O. Biosynthetic potentials of metabolites and their hierarchical  
912 organization. *PLoS Comput Biol.* 2008;4(4). doi:10.1371/journal.pcbi.1000049
- 913 53. Carr R, Borenstein E. NetSeed: A network-based reverse-ecology tool for calculating the metabolic interface  
914 of an organism with its environment. *Bioinformatics.* 2012;28(5):734-735.  
915 doi:10.1093/bioinformatics/btr721
- 916 54. Kreimer A, Doron-Faigenboim A, Borenstein E, Freilich S. NetCmpt: A network-based tool for calculating  
917 the metabolic competition between bacterial species. *Bioinformatics.* 2012;28(16):2195-2197.  
918 doi:10.1093/bioinformatics/bts323
- 919 55. Levy R, Carr R, Kreimer A, Freilich S, Borenstein E. NetCooperate: a network-based tool for inferring host-  
920 microbe and microbe-microbe cooperation. *BMC Bioinformatics.* 2015;16(1):164. doi:10.1186/s12859-015-  
921 0588-y
- 922 56. Opatovsky I, Santos-Garcia D, Ruan Z, Lahav T, Ofaim S, Mouton L, Barbe V, Jiang J, Zchori-Fein E,  
923 Freilich S. Modeling trophic dependencies and exchanges among insects' bacterial symbionts in a host-  
924 simulated environment. *BMC Genomics.* 2018;19(1):1-14. doi:10.1186/s12864-018-4786-7
- 925 57. Freilich S, Kreimer A, Borenstein E, Yosef N, Sharan R, Gophna U, Ruppin E. Metabolic-network-driven  
926 analysis of bacterial ecological strategies. *Genome Biol.* 2009;10(6):1-8. doi:10.1186/gb-2009-10-6-r61
- 927 58. Handorf T, Christian N, Ebenhöf O, Kahn D. An environmental perspective on metabolism. *J Theor Biol.*  
928 2008;252(3):530-537. doi:10.1016/j.jtbi.2007.10.036
- 929 59. Levy R, Borenstein E. Metabolic modeling of species interaction in the human microbiome elucidates  
930 community-level assembly rules. *Proc Natl Acad Sci.* 2013;110(31):12804-9. doi:  
931 10.1073/pnas.1300926110
- 932 60. Smart AG, Amaral LAN, Ottino JM. Cascading failure and robustness in metabolic networks. *Proc Natl*  
933 *Acad Sci.* 2008;105(36):13223-13228. doi:10.1073/pnas.0803571105
- 934 61. Barabási AL. Network Robustness. In: *Network Science*. Cambridge University Press; 2015.
- 935 62. Andrade R, Wannagat M, Klein CC, Acuña V, Marchetti-Spaccamela A, Milreu P V., Stougie L, Sagot M-  
936 F. Enumeration of minimal stoichiometric precursor sets in metabolic networks. *Algorithms Mol Biol.*

- 937 2016;11(1):25. doi:10.1186/s13015-016-0087-3
- 938 63. Schellenberger J, Que R, Fleming RMT, Thiele I, Orth JD, Feist AM, Zielinski DC, Bordbar A, Lewis NE,  
939 Rahmanian S, Kang J, Hyduke DR, Palsson BØ. Quantitative prediction of cellular metabolism with  
940 Constraint based models: the COBRA toolbox v2.0. *Nat Protoc.* 2012;6(9):1290-1307.  
941 doi:10.1038/nprot.2011.308.Quantitative
- 942 64. Laurent Heirendt & Sylvain Arreckx, Thomas Pfau, Sebastian N. Mendoza, Anne Richelle A, Heinken,  
943 Hulda S. Haraldsdottir, Sarah M. Keating, Vanja Vlasov, Jacek Wachowiak S, Magnúsdóttir, Chiam Yu Ng,  
944 German Preciat, Alise Zagare, Siu H.J. Chan MKA, Catherine M. Clancy, Jennifer Modamio, John T. Sauls,  
945 Alberto Noronha, Aarash Bordbar B, Cousins, Diana C. El Assal, Susan Ghaderi, Masoud Ahookhosh  
946 MBG, Inigo Apaolaza, Andrejs Kostromins, Hoai M. Le, Ding Ma, Yuekai Sun, Luis V. Valcarcel, Lin  
947 Wang, James T. Yurkovich, Phan T. Vuong, Lemmer P. El Assal, Scott Hinton W, A. Bryant, Francisco J.  
948 Aragon Artacho, Francisco J. Planes, Egils Stalidzans A, Maass, Santosh Vempala, Michael Hucka, Michael  
949 A. Saunders, Costas D. Maranas N, E. Lewis, Thomas Sauter, Bernhard O. Palsson, Ines Thiele, Ronan M.  
950 T. Fleming. Creation and analysis of biochemical constraint-based models: the COBRA Toolbox v3.0.  
951 *arXiv.* 2017.
- 952 65. Orth JD, Palsson BØ, Fleming RMT. Reconstruction and Use of Microbial Metabolic Networks: the Core  
953 Escherichia coli Metabolic Model as an Educational Guide. *EcoSal Plus.* 2010;4(1).  
954 doi:10.1128/ecosalplus.10.2.1
- 955 66. Vartoukian SR, Moazzez R V, Paster BJ, Dewhirst FE, Wade WG. First Cultivation of Health-Associated  
956 Tannerella sp. HOT-286 (BU063). *J Dent Res.* 2016;95(11):1308-1313. doi:10.1177/0022034516651078
- 957 67. Vartoukian SR, Adamowska A, Lawlor M, Moazzez R, Dewhirst FE, Wade WG. In vitro cultivation of  
958 “unculturable” oral bacteria, facilitated by community culture and media supplementation with siderophores.  
959 *PLoS One.* 2016;11(1):1-19. doi:10.1371/journal.pone.0146926
- 960 68. Campbell JH, O’Donoghue P, Campbell AG, Schwientek P, Sczyrba A, Woyke T, Soll D, Podar M. UGA is  
961 an additional glycine codon in uncultured SR1 bacteria from the human microbiota. *Proc Natl Acad Sci.*  
962 2013;110(14):5540-5545. doi:10.1073/pnas.1303090110
- 963 69. Campbell AG, Campbell JH, Schwientek P, Woyke T, Sczyrba A, Allman S, Beall CJ, Griffen A, Leys E,  
964 Podar M. Multiple Single-Cell Genomes Provide Insight into Functions of Uncultured Deltaproteobacteria  
965 in the Human Oral Cavity. *PLoS One.* 2013;8(3). doi:10.1371/journal.pone.0059361
- 966 70. Arkin AP, Cottingham RW, Henry CS, Harris NL, Stevens RL, Maslov S, Dehal P, Ware D, Perez F, Canon  
967 S, Sneddon MW, Henderson ML, Riehl WJ, Murphy-Olson D, Chan SY, Kamimura RT, Kumari S, Drake  
968 MM, Brettin TS, et al. KBase: The United States Department of Energy Systems Biology Knowledgebase.  
969 *Nat Biotechnol.* 2018;36(7):566-569. doi:10.1038/nbt.4163
- 970 71. Overbeek R, Olson R, Pusch GD, Olsen GJ, Davis JJ, Disz T, Edwards RA, Gerdes S, Parrello B, Shukla M,  
971 Vonstein V, Wattam AR, Xia F, Stevens R. The SEED and the Rapid Annotation of microbial genomes  
972 using Subsystems Technology (RAST). *Nucleic Acids Res.* 2014;42(D1):206-214. doi:10.1093/nar/gkt1226
- 973 72. Akashi H, Gojobori T. Metabolic efficiency and amino acid composition in the proteomes of Escherichia  
974 coli and Bacillus subtilis. *Proc Natl Acad Sci U S A.* 2002;99(6):3695-3700. doi:10.1073/pnas.062526999
- 975 73. Zarecki R, Oberhardt MA, Reshef L, Gophna U, Ruppin E. A Novel Nutritional Predictor Links Microbial  
976 Fastidiousness with Lowered Ubiquity, Growth Rate, and Cooperativeness. *PLoS Comput Biol.* 2014;10(7).  
977 doi:10.1371/journal.pcbi.1003726
- 978 74. Clarke B, Fokoue E, Helen Zhang H. *Principles and Theory for Data Mining and Machine Learning*  
979 *(Springer Series in Statistics);* 2009.
- 980 75. Weidenmaier C, Peschel A. Teichoic acids and related cell-wall glycopolymers in Gram-positive physiology  
981 and host interactions. *Nat Rev Microbiol.* 2008;6(4):276-287. doi:10.1038/nrmicro1861
- 982 76. Al-Dabbagh B, Mengin-Lecreux D, Bouhss A. Purification and Characterization of the Bacterial UDP-

- 983 GlcNAc:Undecaprenyl-Phosphate GlcNAc-1-Phosphate Transferase WecA. *J Bacteriol.*  
984 2008;190(21):7141-7146. doi:10.1128/JB.00676-08
- 985 77. Soldo B, Lazarevic V, Karamata D. *tagO* is involved in the synthesis of all anionic cell-wall polymers in  
986 *Bacillus subtilis* 168. *Microbiology.* 2002;148(Pt 7):2079-2087. doi:10.1099/00221287-148-7-2079
- 987 78. Lehrer J, Vigeant KA, Tatar LD, Valvano MA. Functional characterization and membrane topology of  
988 *Escherichia coli* WecA, a sugar-phosphate transferase initiating the biosynthesis of enterobacterial common  
989 antigen and O-antigen lipopolysaccharide. *J Bacteriol.* 2007;189(7):2618-2628. doi:10.1128/JB.01905-06
- 990 79. Epanand RF, Savage PB, Epanand RM. Bacterial lipid composition and the antimicrobial efficacy of cationic  
991 steroid compounds (Ceragenins). *Biochim Biophys Acta - Biomembr.* 2007;1768(10):2500-2509.  
992 doi:10.1016/j.bbamem.2007.05.023
- 993 80. Epanand RM, Epanand RF. Lipid domains in bacterial membranes and the action of antimicrobial agents.  
994 *Biochim Biophys Acta - Biomembr.* 2009;1788(1):289-294. doi:10.1016/j.bbamem.2008.08.023
- 995 81. Kamio Y, Takahashi H. Isolation and characterization of outer and inner membranes of *Selenomonas*  
996 ruminantium: Lipid compositions. *J Bacteriol.* 1980;141(2):888-898.
- 997 82. Hamana K, Itoh T, Sakamoto M, Hayashi H. Covalently linked polyamines in the cell wall peptidoglycan of  
998 the anaerobes belonging to the order Selenomonadales. 2012;347:339-347.
- 999 83. Choby J, Skaar E. Heme Synthesis and Acquisition in Bacterial Pathogens. *J Mol Biol.* 2016;428(17): 3408–  
1000 3428. doi:10.1016/j.jmb.2016.03.018
- 1001 84. Olczak T, Simpson W, Liu X, Genco CA. Iron and heme utilization in *Porphyromonas gingivalis*. *FEMS*  
1002 *Microbiol Rev.* 2005;29(1):119-144. doi:10.1016/j.femsre.2004.09.001
- 1003 85. Plugge CM, Stams AJM. Arginine catabolism by *Thermanaerovibrio acidaminovorans*. *FEMS Microbiol*  
1004 *Lett.* 2001;195(2):259-262. doi:10.1016/S0378-1097(01)00019-2
- 1005 86. Schink B. Syntrophism among prokaryotes. *The Prokaryotes.* 2006;2:309-335. doi:10.1007/0-387-30742-7
- 1006 87. Fraser CM, Gocayne JD, White O, Adams MD, Clayton RA, Fleischmann RD, Bult CJ, Kerlavage AR,  
1007 Sutton G, Kelley JM, Fritchman JL, Weidman JF, Small K V., Sandusky M, Fuhrmann J, Nguyen D,  
1008 Utterback TR, Saudek DM, Phillips CA, et al. The Minimal Gene Complement of *Mycoplasma genitalium*.  
1009 *Science (80- ).* 1995;270(5235):397-404. doi:10.1126/science.270.5235.397
- 1010 88. Fraser CM, Norris SJ, Weinstock GM, White O, Sutton GG, Dodson R, Gwinn M, Hickey EK, Clayton R,  
1011 Ketchum KA, Sodergren E, Hardham JM, McLeod MP, Salzberg S, Peterson J, Khalak H, Richardson D,  
1012 Howell JK, Chidambaram M, et al. Complete genome sequence of *Treponema pallidum*, the syphilis  
1013 spirochete. *Science.* 1998;281(5375):375-388. doi:10.1126/science.281.5375.375
- 1014 89. Meseguer MA, Álvarez A, Rejas MT, Sánchez C, Pérez-Díaz JC, Baquero F. *Mycoplasma pneumoniae*: a  
1015 reduced-genome intracellular bacterial pathogen. *Infect Genet Evol.* 2003;3:47-55.
- 1016 90. Davis JJ, Xia F, Overbeek RA, Olsen GJ. Genomes of the class Erysipelotrichia clarify the firmicute origin  
1017 of the class Mollicutes. *Int J Syst Evol Microbiol.* 2013;63(PART7):2727-2741. doi:10.1099/ijls.0.048983-0
- 1018 91. Razin S. The mycoplasmas. *Microbiol Rev.* 1978;42(2):414—470.  
1019 <http://pubmedcentral.nih.gov/articlerender.fcgi?artid=281436>.
- 1020 92. Mee MT, Wang HH. Engineering ecosystems and synthetic ecologies. *Mol Biosyst.* 2012;8(10):2470.  
1021 doi:10.1039/c2mb25133g
- 1022 93. Yang Z, Huang S, Zou D, Dong D, He X, Liu N, Liu W, Huang L. Metabolic shifts and structural changes in  
1023 the gut microbiota upon branched-chain amino acid supplementation in middle-aged mice. *Amino Acids.*  
1024 2016;48(12):2731-2745. doi:10.1007/s00726-016-2308-y
- 1025 94. Mitchell A, Finch LR. Pathways of nucleotide biosynthesis in *Mycoplasma mycoides* subsp. *mycoides*. *J*

- 1026 *Bacteriol.* 1977;130(3):1047-1054.
- 1027 95. Bumgarner RE, He X. Draft genome sequence of *Actinomyces odontolyticus* subsp. *actinosynbacter* strain  
1028 XH001, the sasibiont of an oral TM7 epibiont. *Genome Announc.* 2016;4(1):2015-2016.  
1029 doi:10.1128/genomeA.01685-15.
- 1030 96. Shannon P, Markiel A, Owen Ozier 2, Baliga NS, Wang JT, Ramage D, Amin N, Schwikowski B, Ideker T.  
1031 Cytoscape: a software environment for integrated models of biomolecular interaction networks. *Genome*  
1032 *Res.* 2003;(13):2498-2504. doi:10.1101/gr.1239303.metabolite
- 1033 97. Kruse K, Ebenhöf O. Comparing flux balance analysis to network expansion: producibility, sustainability  
1034 and the scope of compounds. *Genome Informatics.* 2008;20:91-101. doi:9781848163003\_0008 [pii]
- 1035 98. Price MN, Wetmore KM, Waters RJ, Callaghan M, Ray J, Kuehl J V, Melnyk RA, Lamson JS, Suh Y,  
1036 Esquivel Z, Sadeeshkumar H, Chakraborty R, Rubin BE, Bristow J, Blow MJ, Arkin AP, Deutschbauer AM.  
1037 Deep Annotation of Protein Function across Diverse Bacteria from Mutant Phenotypes. *bioRxiv.*  
1038 2016:072470. doi:10.1101/072470
- 1039 99. Vaccaro BJ, Thorgersen MP, Lancaster WA, Price MN, Wetmore KM, Poole FL, Deutschbauer A, Arkin  
1040 AP, Adams MWW. Determining roles of accessory genes in denitrification by mutant fitness analyses. *Appl*  
1041 *Environ Microbiol.* 2016;82(1):51-61. doi:10.1128/AEM.02602-15
- 1042 100. Price MN, Zane GM, Kuehl J V., Melnyk RA, Wall JD, Deutschbauer AM, Arkin AP. Filling gaps in  
1043 bacterial amino acid biosynthesis pathways with high-throughput genetics. *PLOS Genet.*  
1044 2018;14(1):e1007147. doi:10.1371/journal.pgen.1007147
- 1045 101. Sévin DC, Fuhrer T, Zamboni N, Sauer U. Nontargeted in vitro metabolomics for high-throughput  
1046 identification of novel enzymes in *Escherichia coli*. *Nat Methods.* 2017;14(2):187-194.  
1047 doi:10.1038/nmeth.4103
- 1048 102. King ZA, Lu J, Dräger A, Miller P, Federowicz S, Lerman JA, Ebrahim A, Palsson BO, Lewis NE. BiGG  
1049 Models: A platform for integrating, standardizing and sharing genome-scale models. *Nucleic Acids Res.*  
1050 2016;44(D1):D515-D522. doi:10.1093/nar/gkv1049
- 1051 103. Beall CJ, Campbell AG, Dayeh DM, Griffen AL, Podar M, Leys EJ. Single cell genomics of uncultured,  
1052 health-associated *Tannerella* BU063 (oral taxon 286) and comparison to the closely related pathogen  
1053 *Tannerella forsythia*. *PLoS One.* 2014;9(2):1-10. doi:10.1371/journal.pone.0089398
- 1054 104. Albertsen M, Hugenholtz P, Skarshewski A, Nielsen KL, Tyson GW, Nielsen PH. Genome sequences of  
1055 rare, uncultured bacteria obtained by differential coverage binning of multiple metagenomes. *Nat*  
1056 *Biotechnol.* 2013;31(6):533-538. doi:10.1038/nbt.2579
- 1057 105. Podar M, Abulencia CB, Walcher M, Hutchison D, Zengler K, Garcia JA, Holland T, Cotton D, Hauser L,  
1058 Keller M. Targeted access to the genomes of low-abundance organisms in complex microbial communities.  
1059 *Appl Environ Microbiol.* 2007;73(10):3205-3214. doi:10.1128/AEM.02985-06
- 1060 106. Aziz RK, Bartels D, Best AA, DeJongh M, Disz T, Edwards RA, Formsma K, Gerdes S, Glass EM, Kubal  
1061 M, Meyer F, Olsen GJ, Olson R, Osterman AL, Overbeek RA, McNeil LK, Paarmann D, Paczian T, Parrello  
1062 B, et al. The RAST Server: Rapid annotations using subsystems technology. *BMC Genomics.* 2008;9(1):75.  
1063 doi:10.1186/1471-2164-9-75
- 1064 107. Brettin T, Davis JJ, Disz T, Edwards RA, Gerdes S, Olsen GJ, Olson R, Overbeek R, Parrello B, Pusch GD,  
1065 Shukla M, Thomason JA, Stevens R, Vonstein V, Wattam AR, Xia F. RASTtk: A modular and extensible  
1066 implementation of the RAST algorithm for building custom annotation pipelines and annotating batches of  
1067 genomes. *Sci Rep.* 2015;5(1):8365. doi:10.1038/srep08365
- 1068
